# Supplementary material for: A Comparison between Enrichment Optimization Algorithm (EOA)-Based and Docking-Based Virtual Screening
Source: MDPI journal article supplement (doi:10.3390/ijms23010043), 2021-12-21
Supplement: s1 [file s1]

### **Supplementary Information**

A comparison between Enrichment Optimization Algorithm (EOA)-based and docking-based virtual screening

Authors: Jacob Spiegel and Hanoach Senderowitz\*

Affiliation: Department of Chemistry, Bar-Ilan University, Ramat-Gan 5290002, Israel

\* Corresponding author: Hanoach Senderowitz, Email: [hsenderowitz@gmail.com](mailto:hsenderowitz@gmail.com)

### Description of the modified EOA algorithm:

Given a dataset of  $M$  compounds (of which  $L$  are active and  $O$  are inactive), characterized by  $N$  descriptors:

1. Select  $\{X_i\}_{i=1,k}$  random descriptors. Note that  $k$  is a subset of  $N$ .
2. Select  $\{C_i\}_{i=1,k}$  random weights.
3. For each compound calculate a predictive activity value:  $A_j = \sum_{i=1}^k X_i C_i$ .
4. Sort  $\{A_j\}_{j=1,M}$ , from highest to lowest.
5. Calculate the primary score by counting the number of known actives, within the first  $L$  places of the sorted list. Call this score  $P_1$ .
6. Independently normalize the indices of the  $L$  active compounds and the  $O$  inactive compounds. Designate the normalized indices as  $j'$  and  $j''$ , respectively.
7. Sum the normalized  $j'$  indices for the active compounds with ranks  $> L$ ,  $S_{active} = \sum_{v=1}^O j'_v$ .
8. Sum the normalized  $j''$  indices for the inactive compounds with ranks  $< L$ ,  $S_{inactive} = \sum_{u=1}^L j''_u$ .
9. Calculate the secondary score as  $S_1 = S_{active} - S_{inactive}$ .
10. Normalize  $S_1$  to the range [0-1] by means of an inverse sigmoid function of the form:  $(S_1) = \frac{1}{1+e^{C \times S_1}}$ , where  $C = 0.07$ .
11. Calculate the total score as  $T_1 = P_1 + \text{normalized } S_1$ .
12. Optionally select new descriptors with new weights and/or modify the weights of the current descriptors so that  $C_i^{new} = C_i^{old} \pm \Delta J$ , where,  $\Delta J$  = random number between specific ranges.
13. Calculate  $A_j^{new} = \sum_{i=1}^k X_i C_i^{new}$  or  $A_j^{new} = \sum_{i=1}^k X_i^{new} C_i^{new}$ .
14. Sort  $\{A_j^{new}\}_{j=1,M}$ , from highest to lowest.
15. Calculate  $T_2$  according to steps (5-11).
16. If  $T_2 > T_1$ , accept and set:  $T_1 = T_2$ ;  $X_i^{old} = X_i^{new}$ ;  $C_i^{old} = C_i^{new}$ .
17. If  $T_2 \leq T_1$ , accept according to the Metropolis MC criterion:
18. A number,  $r[0,1]$  is generated randomly and the step is accepted if  $r < e^{-\frac{\Delta E}{RT}}$ , where  $\Delta E = T_1 - T_2$ . When using MMC simulations to obtain the canonical ensemble,  $R$  is the gas constant and  $T$  is the absolute temperature. When using MMC as global optimizer as in the present case,  $R$  and  $T$  are constants with no physical meaning and their values simply determine the acceptance rate. In the present case, the term  $RT$  was linearly reduced in accord with the simulated annealing procedure.
19. If the step is rejected, keep the old values of the descriptors and weights.
20. Go back to step 12.

Table S1. 1D and 2D descriptors calculated by the Canvas program.

| Descriptor Family | 1D/2D   | # descriptors |
|-------------------|---------|---------------|
| Physicochemical   | 1D & 2D | 365           |
| Topological       | 2D      | 219           |
| LigFilter         | 1D & 2D | 170           |

Table S2. A list of the most common descriptors appearing in all EOA equations derived for each dataset. For each descriptor, the number of occurrences and a short description is provided.

| Dataset | Descriptor                                                         | #occurrences | Comment                                                                                                           |
|---------|--------------------------------------------------------------------|--------------|-------------------------------------------------------------------------------------------------------------------|
| ACES    | MR1                                                                | 9            | Molar refractivity                                                                                                |
|         | Balaban-type index from Z weighted distance matrix - Barysz matrix | 8            | Balaban Index                                                                                                     |
|         | ssCH2_Avg                                                          | 6            | Average value of the ssCH2 electrotopological state index                                                         |
|         | Ring bridge count                                                  | 6            | Number of ring bridges in the molecule                                                                            |
| HIVPR   | Neutral acceptor groups                                            | 7            | Number of neutral acceptor groups in the molecule                                                                 |
|         | sOm_Key                                                            | 7            | Presence of the sOM (electrotopological state index nomenclature) moiety in the molecule                          |
|         | sssN_Key                                                           | 7            | Presence of the sssN (electrotopological state index nomenclature) moiety in the molecule                         |
|         | aaCH_Avg                                                           | 6            | Average value of the aaCH electrotopological state index                                                          |
|         | aaCH_Cnt                                                           | 6            | Number of the aaCH (electrotopological state index nomenclature) moieties in the molecule                         |
|         | dssC_Cnt                                                           | 6            | Number of the dssC (electrotopological state index nomenclature) moieties in the molecule                         |
|         | PEOE6                                                              | 6            | Molecular charge descriptor calculated using Gasteiger's Partial equalization of orbital electronegativity method |

|      |                                           |    |                                                                                                                   |
|------|-------------------------------------------|----|-------------------------------------------------------------------------------------------------------------------|
| MK14 | PEOE3                                     | 12 | Molecular charge descriptor calculated using Gasteiger's Partial equalization of orbital electronegativity method |
|      | Sum of topological distances between N..N | 9  | Sum of topological distances between all nitrogen atoms in the molecule                                           |
|      | PEOE5                                     | 8  | Molecular charge descriptor calculated using Gasteiger's Partial equalization of orbital electronegativity method |
|      | aaN_Key                                   | 8  | Presence of the aaN (electrotopological state index nomenclature) moiety in the molecule                          |
|      | aasC_Cnt                                  | 7  | Number of the aasC (electrotopological state index nomenclature) moieties in the molecule                         |
| UROC | PEOE3                                     | 12 | Molecular charge descriptor calculated using Gasteiger's Partial equalization of orbital electronegativity method |
|      | HBD                                       | 11 | Number of hydrogen bond donors in the molecule                                                                    |
|      | Donor groups                              | 7  | Number of donor groups in the molecule                                                                            |
|      | ALOGP2                                    | 6  | Water-Octanol partition descriptor                                                                                |
|      | sOH_Key                                   | 6  | Presence of the sOH (electrotopological state index nomenclature) moiety in the molecule                          |
|      | aaCH_Cnt                                  | 6  | Number of the aaCH (electrotopological state index nomenclature) moieties in the molecule                         |
|      | H-N                                       | 6  | Number of H-N moieties in the molecule                                                                            |
| TRY1 | HBD                                       | 10 | Number of hydrogen bond donors in the molecule                                                                    |
|      | H-N                                       | 10 | Number of H-N moieties in the molecule                                                                            |
|      | ssCH2_Cnt                                 | 8  | Number of the ssCH2 (electrotopological state index nomenclature) moieties in the molecule                        |
|      | ALOGP3                                    | 6  | Water-Octanol partition descriptor                                                                                |

Table S3. A complete listing of all the descriptors appearing in all EOA equations derived for all datasets. For each descriptor, the total number of occurrences is provided.

| Dataset | Descriptor                                                         | #occurences |
|---------|--------------------------------------------------------------------|-------------|
| ACES    | MR1                                                                | 9           |
|         | Balaban-type index from Z weighted distance matrix - Barysz matrix | 8           |
|         | ssCH2_Avg                                                          | 6           |
|         | Ring bridge count                                                  | 6           |
|         | Sum of topological distances between O..O                          | 5           |
|         | sssN_Key                                                           | 5           |
|         | Ring Count 5                                                       | 5           |
|         | PEOE13                                                             | 5           |
|         | Mean topological charge index of order 2                           | 5           |
|         | aaCH_Avg                                                           | 5           |
|         | RingCount                                                          | 4           |
|         | dssC_Cnt                                                           | 4           |
|         | dO_Key                                                             | 4           |
|         | ssCH2_Cnt                                                          | 3           |
|         | PEOE9                                                              | 3           |
|         | PEOE12                                                             | 3           |
|         | PEOE11                                                             | 3           |
|         | Num aliphatic rings                                                | 3           |
|         | MW                                                                 | 3           |
|         | Mean topological charge index of order 4                           | 3           |
|         | ChiralCenterCount                                                  | 3           |
|         | Average valence connectivity index chi-0                           | 3           |
|         | aasC_Avg                                                           | 3           |
|         | RB                                                                 | 2           |
|         | Global topological charge                                          | 2           |
|         | aasC_Cnt                                                           | 2           |
|         | Tertiary amines or amides                                          | 1           |
|         | Sum of topological distances between N..S                          | 1           |
|         | ssO_Key                                                            | 1           |
|         | sCH3_Cnt                                                           | 1           |

|       |                                               |   |
|-------|-----------------------------------------------|---|
|       | sCH3_Avg                                      | 1 |
|       | PEOE14                                        | 1 |
|       | Mean topological charge index of order 9      | 1 |
|       | Mean topological charge index of order 8      | 1 |
|       | Maximal electrotopological negative variation | 1 |
|       | ALOGP6                                        | 1 |
|       | aaN_Key                                       | 1 |
| HIVPR | Neutral acceptor groups                       | 7 |
|       | sOm_Key                                       | 7 |
|       | sssN_Key                                      | 7 |
|       | aaCH_Avg                                      | 6 |
|       | aaCH_Cnt                                      | 6 |
|       | dssC_Cnt                                      | 6 |
|       | PEOE6                                         | 6 |
|       | aasC_Avg                                      | 5 |
|       | dO_Cnt                                        | 5 |
|       | ssCH2_Cnt                                     | 5 |
|       | aasC_Cnt                                      | 4 |
|       | Maximal electrotopological positive variation | 4 |
|       | Ring Count 5                                  | 4 |
|       | ChiralCenterCount                             | 3 |
|       | dO_Avg                                        | 3 |
|       | Mean topological charge index of order 10     | 3 |
|       | Sum of topological distances between N..N     | 3 |
|       | aasN_Key                                      | 2 |
|       | dsCH_Key                                      | 2 |
|       | Maximal electrotopological negative variation | 2 |
|       | MW                                            | 2 |
|       | PEOE3                                         | 2 |
|       | PEOE9                                         | 2 |
|       | PSA                                           | 2 |
|       | sssCH_Key                                     | 2 |
|       | Total charge                                  | 1 |

|      |                                           |    |
|------|-------------------------------------------|----|
|      | aaN_Key                                   | 1  |
|      | ALOGP                                     | 1  |
|      | ALOGP6                                    | 1  |
|      | ALOGP7                                    | 1  |
|      | Average eccentricity                      | 1  |
|      | dssC_Sum                                  | 1  |
|      | Global topological charge                 | 1  |
|      | HBA                                       | 1  |
|      | HBD                                       | 1  |
|      | Mean topological charge index of order 7  | 1  |
|      | Mean topological charge index of order 8  | 1  |
|      | Num aliphatic rings                       | 1  |
|      | PEOE10                                    | 1  |
|      | RingCount                                 | 1  |
|      | sCH3_Cnt                                  | 1  |
|      | Sum of topological distances between N..S | 1  |
|      | Sum of topological distances between O..O | 1  |
| MK14 | PEOE3                                     | 12 |
|      | Sum of topological distances between N..N | 9  |
|      | PEOE5                                     | 8  |
|      | aaN_Key                                   | 8  |
|      | aasC_Cnt                                  | 7  |
|      | ChiralCenterCount                         | 6  |
|      | RingCount                                 | 5  |
|      | PSA                                       | 5  |
|      | HBD                                       | 5  |
|      | Ring bridge count                         | 5  |
|      | Neutral acceptor groups                   | 4  |
|      | dO_Cnt                                    | 4  |
|      | PEOE6                                     | 3  |
|      | path/walk 3 - Randic shape index          | 3  |
|      | ssNH_Key                                  | 3  |
|      | Mean topological charge index of order 3  | 3  |

|      |                                               |    |
|------|-----------------------------------------------|----|
|      | RB                                            | 2  |
|      | PEOE11                                        | 2  |
|      | dO_Avg                                        | 2  |
|      | aaCH_Cnt                                      | 2  |
|      | PEOE1                                         | 2  |
|      | Sum of topological distances between O..S     | 1  |
|      | ssO_Key                                       | 1  |
|      | ssCH2_Cnt                                     | 1  |
|      | Ring Count 5                                  | 1  |
|      | PEOE7                                         | 1  |
|      | PEOE12                                        | 1  |
|      | Num aliphatic rings                           | 1  |
|      | MW                                            | 1  |
|      | ALOGP6                                        | 1  |
|      | ALOGP5                                        | 1  |
|      | Sum of topological distances between N..S     | 1  |
|      | sssN_Key                                      | 1  |
|      | PEOE14                                        | 1  |
|      | PEOE13                                        | 1  |
|      | Mean topological charge index of order 4      | 1  |
|      | Maximal electrotopological negative variation | 1  |
|      | Global topological charge                     | 1  |
|      | Amide hydrogens                               | 1  |
|      | sCH3_Cnt                                      | 1  |
|      | ALOGP3                                        | 1  |
| UROK | PEOE3                                         | 12 |
|      | HBD                                           | 11 |
|      | Donor groups                                  | 7  |
|      | ALOGP2                                        | 6  |
|      | sOH_Key                                       | 6  |
|      | aaCH_Cnt                                      | 6  |
|      | H-N                                           | 6  |
|      | Mean topological charge index of order 4      | 4  |



|      |                                                                    |    |
|------|--------------------------------------------------------------------|----|
|      | ALOGP7                                                             | 4  |
|      | MR1                                                                | 4  |
|      | ALOGP5                                                             | 3  |
|      | PEOE14                                                             | 3  |
|      | ALOGP4                                                             | 3  |
|      | Sum of topological distances between N..O                          | 3  |
|      | ssCH2_Cnt                                                          | 3  |
|      | ssNH_Key                                                           | 3  |
|      | MW                                                                 | 2  |
|      | Mean topological charge index of order 8                           | 2  |
|      | PEOE13                                                             | 2  |
|      | aaCH_Avg                                                           | 2  |
|      | Maximal electrotopological negative variation                      | 2  |
|      | Sum of topological distances between N..N                          | 2  |
|      | Mean topological charge index of order 10                          | 2  |
|      | sNH2_Key                                                           | 2  |
|      | PEOE10                                                             | 2  |
|      | Amide hydrogens                                                    | 2  |
|      | aaN_Key                                                            | 2  |
|      | Average connectivity index chi-1                                   | 1  |
|      | dssC_Sum                                                           | 1  |
|      | Mean topological charge index of order 6                           | 1  |
|      | PEOE7                                                              | 1  |
|      | aasC_Cnt                                                           | 1  |
|      | RB                                                                 | 1  |
|      | Balaban-type index from Z weighted distance matrix - Barysz matrix | 1  |
|      | Mean topological charge index of order 5                           | 1  |
|      | PEOE6                                                              | 1  |
|      | ALOGP6                                                             | 1  |
|      | dO_Cnt                                                             | 1  |
|      | Ring bridge count                                                  | 1  |
| TRY1 | HBD                                                                | 10 |
|      | H-N                                                                | 10 |

|                                                                    |   |
|--------------------------------------------------------------------|---|
| ssCH2_Cnt                                                          | 8 |
| ALOGP3                                                             | 6 |
| ALOGP2                                                             | 5 |
| MW                                                                 | 5 |
| aaCH_Cnt                                                           | 5 |
| PEOE11                                                             | 4 |
| PEOE13                                                             | 4 |
| Mean topological charge index of order 4                           | 4 |
| PEOE3                                                              | 3 |
| PEOE14                                                             | 3 |
| ALOGP7                                                             | 3 |
| MR1                                                                | 3 |
| sNH2_Key                                                           | 3 |
| Ring Count 5                                                       | 3 |
| ALOGP6                                                             | 3 |
| PEOE12                                                             | 2 |
| PEOE9                                                              | 2 |
| Global topological charge                                          | 2 |
| sOH_Key                                                            | 2 |
| aaCH_Avg                                                           | 2 |
| dssC_Sum                                                           | 2 |
| Ring bridge count                                                  | 2 |
| sCH3_Avg                                                           | 2 |
| Maximal electrotopological negative variation                      | 2 |
| Sum of topological distances between N..O                          | 1 |
| Total structure connectivity                                       | 1 |
| Mean topological charge index of order 5                           | 1 |
| ssNH_Cnt                                                           | 1 |
| PEOE10                                                             | 1 |
| Balaban-type index from Z weighted distance matrix - Barysz matrix | 1 |
| RB                                                                 | 1 |
| dO_Avg                                                             | 1 |
| sssCH_Sum                                                          | 1 |

|  |                                           |   |
|--|-------------------------------------------|---|
|  | ChiralCenterCount                         | 1 |
|  | Mean topological charge index of order 7  | 1 |
|  | PEOE7                                     | 1 |
|  | ALOGP5                                    | 1 |
|  | ALOGP4                                    | 1 |
|  | Sum of topological distances between O..S | 1 |
|  | RingCount                                 | 1 |
|  | dssC_Cnt                                  | 1 |
|  | sssN_Key                                  | 1 |
|  | AlogP                                     | 1 |
|  | Mean topological charge index of order 6  | 1 |

Table S4. EOA and docking results for all test sets expressed in terms of AUC and EF<sub>1%</sub> values. The docking results are based on the DUD-E associated crystal structures (1e66, 1x12, 2qd9, 1sqt, and 2ayw for ACES, HIVPR, MK14, UROK, and TRY1, respectively).

| Set | Method  | AUC   |       |       |       |       | EF <sub>1%</sub> |        |        |        |        |
|-----|---------|-------|-------|-------|-------|-------|------------------|--------|--------|--------|--------|
|     |         | ACES  | HIVPR | MK14  | UROK  | TRY1  | ACES             | HIVPR  | MK14   | UROK   | TRY1   |
| 1   | EOA-7   | 0.862 | 0.775 | 0.905 | 0.997 | 0.979 | 36.449           | 3.965  | 40.132 | 77.551 | 73.810 |
|     | EOA-10  | 0.886 | 0.946 | 0.947 | 0.997 | 0.996 | 26.168           | 20.705 | 39.474 | 81.633 | 80.159 |
|     | EOA-13  | 0.899 | 0.977 | 0.927 | 0.996 | 0.986 | 58.879           | 59.471 | 25.658 | 81.633 | 58.730 |
|     | AD Vina | 0.782 | 0.703 | 0.727 | 0.771 | 0.809 | 14.019           | 0.881  | 7.237  | 6.122  | 6.349  |
|     | GOLD    | 0.753 | 0.665 | 0.696 | 0.831 | 0.808 | 34.579           | 9.692  | 9.211  | 30.612 | 11.905 |
|     | Glide   | 0.696 | 0.607 | 0.561 | 0.850 | 0.772 | 13.084           | 4.405  | 11.184 | 48.980 | 11.905 |
| 2   | EOA-7   | 0.808 | 0.813 | 0.902 | 0.986 | 0.958 | 8.411            | 14.097 | 20.395 | 69.388 | 75.397 |
|     | EOA-10  | 0.885 | 0.955 | 0.914 | 0.978 | 0.982 | 43.925           | 21.586 | 41.447 | 81.633 | 79.365 |
|     | EOA-13  | 0.921 | 0.927 | 0.925 | 0.987 | 0.966 | 9.346            | 19.383 | 37.500 | 73.469 | 71.429 |
|     | AD Vina | 0.781 | 0.694 | 0.753 | 0.784 | 0.805 | 14.019           | 2.203  | 3.947  | 6.122  | 4.762  |
|     | GOLD    | 0.738 | 0.628 | 0.708 | 0.830 | 0.827 | 31.776           | 9.251  | 6.579  | 32.653 | 21.429 |
|     | Glide   | 0.651 | 0.584 | 0.537 | 0.817 | 0.780 | 15.888           | 3.084  | 11.184 | 40.816 | 19.841 |
| 3   | EOA-7   | 0.896 | 0.918 | 0.894 | 0.955 | 0.982 | 42.991           | 9.692  | 25.000 | 79.592 | 76.984 |
|     | EOA-10  | 0.860 | 0.946 | 0.891 | 0.956 | 0.980 | 7.477            | 34.802 | 23.684 | 75.510 | 79.365 |
|     | EOA-13  | 0.895 | 0.882 | 0.918 | 0.959 | 0.981 | 21.495           | 31.718 | 27.632 | 89.796 | 73.016 |
|     | AD Vina | 0.795 | 0.709 | 0.717 | 0.803 | 0.795 | 15.888           | 0.441  | 4.605  | 8.163  | 5.556  |
|     | GOLD    | 0.730 | 0.666 | 0.696 | 0.881 | 0.831 | 26.168           | 11.013 | 7.895  | 34.694 | 20.635 |
|     | Glide   | 0.670 | 0.615 | 0.573 | 0.871 | 0.788 | 17.757           | 5.286  | 15.789 | 48.980 | 19.841 |
| 4   | EOA-7   | 0.859 | 0.915 | 0.892 | 0.980 | 0.983 | 14.019           | 16.300 | 21.711 | 61.224 | 80.159 |
|     | EOA-10  | 0.919 | 0.922 | 0.934 | 0.986 | 0.982 | 58.879           | 13.656 | 23.026 | 67.347 | 76.190 |
|     | EOA-13  | 0.945 | 0.978 | 0.934 | 0.983 | 0.983 | 13.084           | 51.542 | 36.184 | 79.592 | 79.365 |
|     | AD Vina | 0.810 | 0.718 | 0.747 | 0.798 | 0.798 | 12.150           | 2.203  | 7.895  | 12.245 | 7.143  |
|     | GOLD    | 0.742 | 0.642 | 0.681 | 0.797 | 0.802 | 28.037           | 10.132 | 7.237  | 24.490 | 19.048 |
|     | Glide   | 0.633 | 0.611 | 0.548 | 0.866 | 0.791 | 14.953           | 5.286  | 12.500 | 40.816 | 26.984 |

Table S5. EOA and docking results for all test sets expressed in terms of AUC and EF<sub>1%</sub> values. The docking results are based on the alternative crystal structures (1acj, 2pwc, 3o8t, 4fue, and 3rxl for ACES, HIVPR, MK14, UROK, and TRY1, respectively).

| Set | Method  | AUC   |       |       |       |       | EF <sub>1%</sub> |        |        |        |        |
|-----|---------|-------|-------|-------|-------|-------|------------------|--------|--------|--------|--------|
|     |         | ACES  | HIVPR | MK14  | UROK  | TRY1  | ACES             | HIVPR  | MK14   | UROK   | TRY1   |
| 1   | EOA-7   | 0.862 | 0.775 | 0.905 | 0.997 | 0.979 | 36.449           | 3.965  | 40.132 | 77.551 | 73.810 |
|     | EOA-10  | 0.886 | 0.946 | 0.947 | 0.997 | 0.996 | 26.168           | 20.705 | 39.474 | 81.633 | 80.159 |
|     | EOA-13  | 0.899 | 0.977 | 0.927 | 0.996 | 0.986 | 58.879           | 59.471 | 25.658 | 81.633 | 58.730 |
|     | AD Vina | 0.763 | 0.754 | 0.712 | 0.739 | 0.805 | 6.542            | 7.048  | 9.211  | 4.082  | 6.349  |
|     | GOLD    | 0.722 | 0.734 | 0.607 | 0.817 | 0.872 | 25.234           | 14.097 | 6.579  | 32.653 | 23.016 |
|     | Glide   | 0.736 | 0.682 | 0.746 | 0.738 | 0.813 | 13.208           | 12.335 | 12.500 | 38.776 | 37.600 |
| 2   | EOA-7   | 0.808 | 0.813 | 0.902 | 0.986 | 0.958 | 8.411            | 14.097 | 20.395 | 69.388 | 75.397 |
|     | EOA-10  | 0.885 | 0.955 | 0.914 | 0.978 | 0.982 | 43.925           | 21.586 | 41.447 | 81.633 | 79.365 |
|     | EOA-13  | 0.921 | 0.927 | 0.925 | 0.987 | 0.966 | 9.346            | 19.383 | 37.500 | 73.469 | 71.429 |
|     | AD Vina | 0.763 | 0.762 | 0.734 | 0.759 | 0.784 | 7.477            | 3.965  | 7.895  | 0.000  | 6.349  |
|     | GOLD    | 0.705 | 0.696 | 0.626 | 0.743 | 0.843 | 21.495           | 12.775 | 7.237  | 24.490 | 23.016 |
|     | Glide   | 0.675 | 0.606 | 0.733 | 0.773 | 0.790 | 8.411            | 9.292  | 11.184 | 32.653 | 42.400 |
| 3   | EOA-7   | 0.896 | 0.918 | 0.894 | 0.955 | 0.982 | 42.991           | 9.692  | 25.000 | 79.592 | 76.984 |
|     | EOA-10  | 0.860 | 0.946 | 0.891 | 0.956 | 0.980 | 7.477            | 34.802 | 23.684 | 75.510 | 79.365 |
|     | EOA-13  | 0.895 | 0.882 | 0.918 | 0.959 | 0.981 | 21.495           | 31.718 | 27.632 | 89.796 | 73.016 |
|     | AD Vina | 0.758 | 0.776 | 0.747 | 0.750 | 0.790 | 5.607            | 8.370  | 9.868  | 6.122  | 3.175  |
|     | GOLD    | 0.693 | 0.727 | 0.608 | 0.831 | 0.848 | 20.561           | 17.621 | 8.553  | 34.694 | 29.365 |
|     | Glide   | 0.698 | 0.654 | 0.742 | 0.787 | 0.817 | 10.280           | 9.778  | 13.816 | 38.776 | 42.857 |
| 4   | EOA-7   | 0.859 | 0.915 | 0.892 | 0.980 | 0.983 | 14.019           | 16.300 | 21.711 | 61.224 | 80.159 |
|     | EOA-10  | 0.919 | 0.922 | 0.934 | 0.986 | 0.982 | 58.879           | 13.656 | 23.026 | 67.347 | 76.190 |
|     | EOA-13  | 0.945 | 0.978 | 0.934 | 0.983 | 0.983 | 13.084           | 51.542 | 36.184 | 79.592 | 79.365 |
|     | AD Vina | 0.791 | 0.785 | 0.741 | 0.764 | 0.805 | 4.673            | 5.727  | 4.605  | 8.163  | 3.968  |
|     | GOLD    | 0.714 | 0.731 | 0.615 | 0.791 | 0.859 | 16.822           | 14.097 | 7.237  | 28.571 | 26.984 |
|     | Glide   | 0.693 | 0.630 | 0.742 | 0.761 | 0.817 | 10.280           | 12.335 | 10.526 | 40.816 | 47.200 |

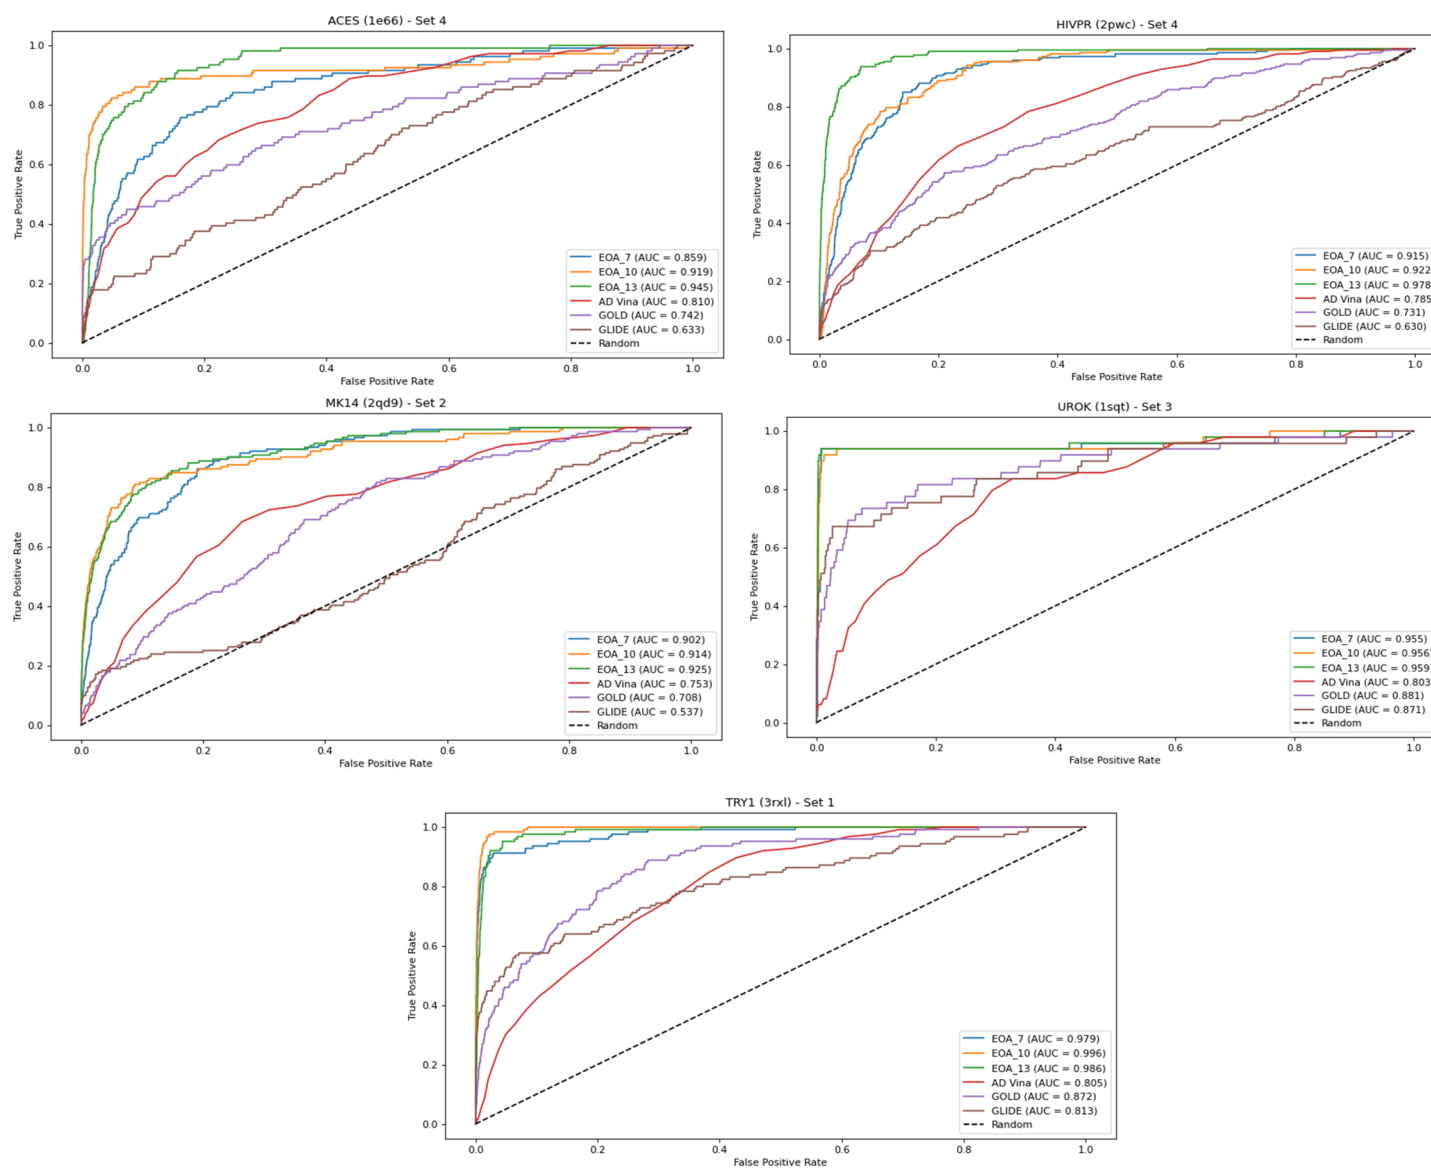

Figure S1. ROC curves for the best-performing docking method (across the two structures and the four subsets) compared with EOA and the other docking methods (see text for more details). In all cases, the EOA performed better than all docking methods.

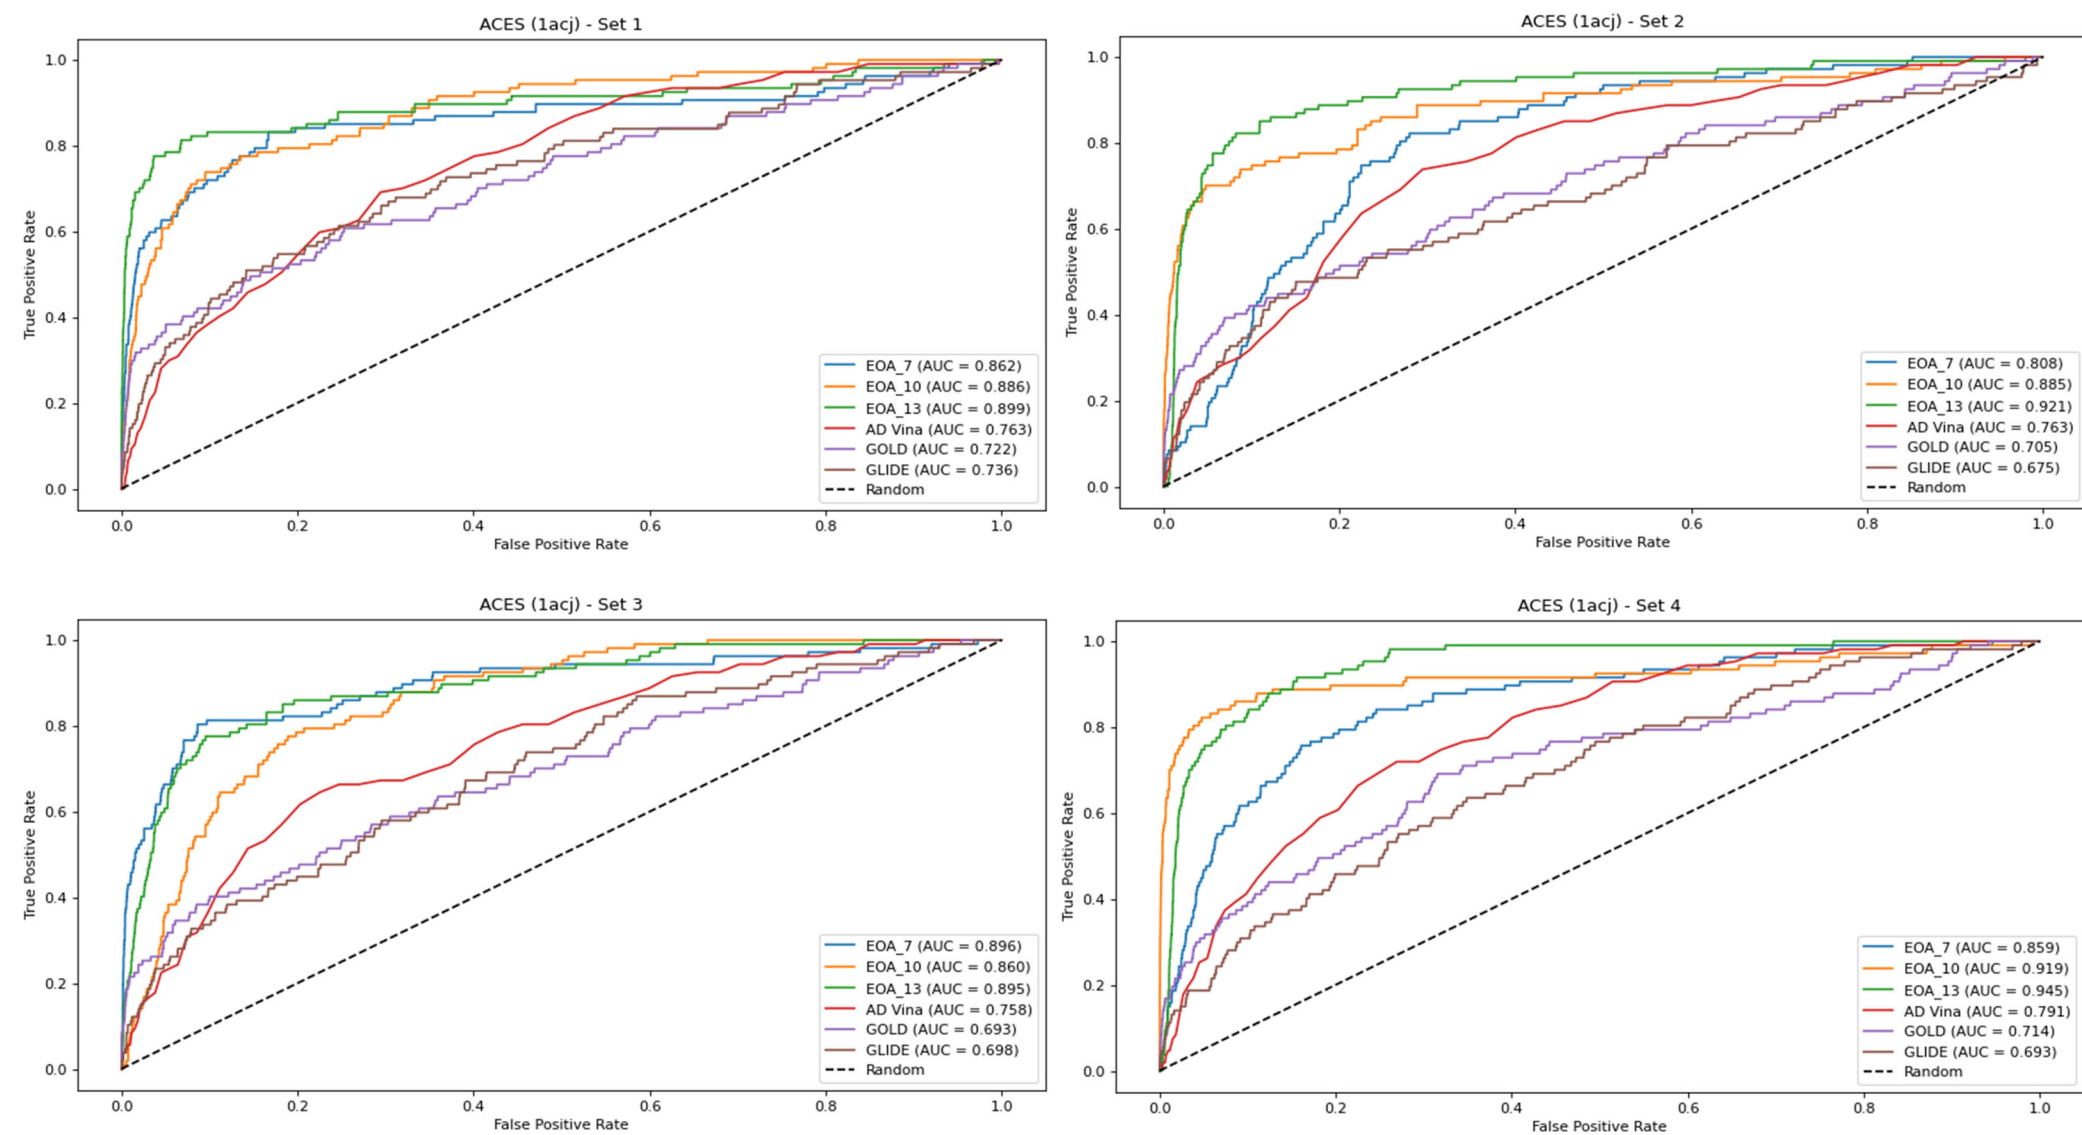

Figure S2. ROC curves for the four ACES (1acj) subsets.

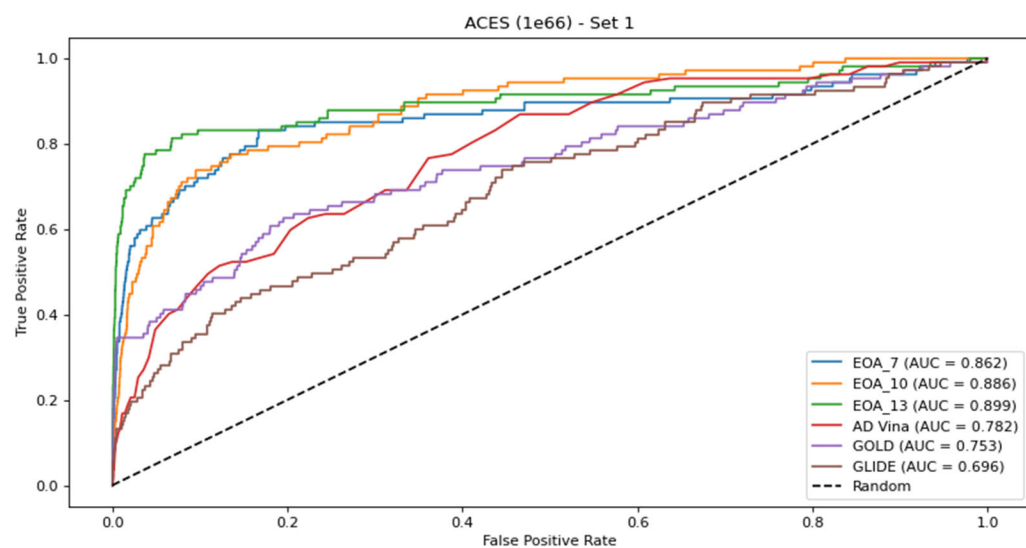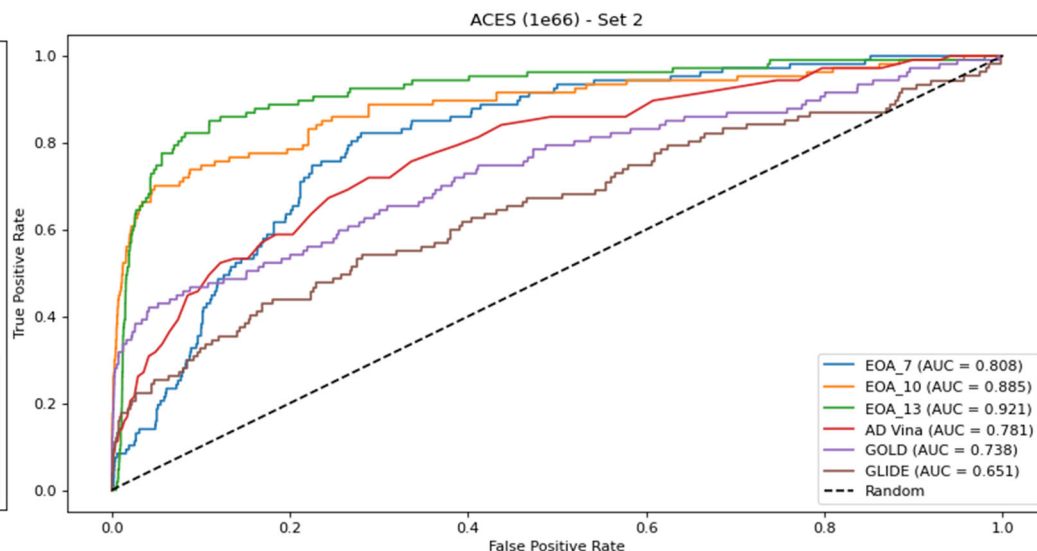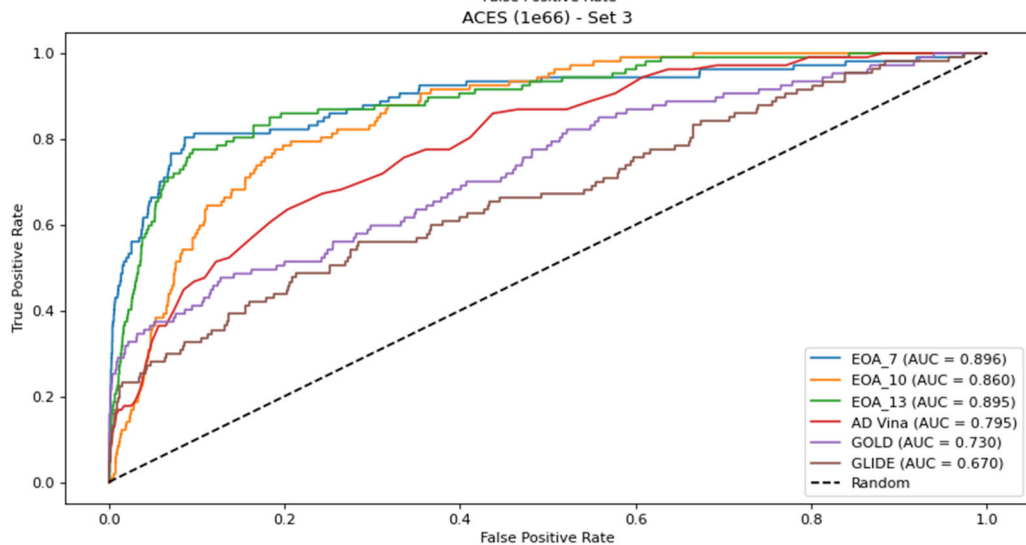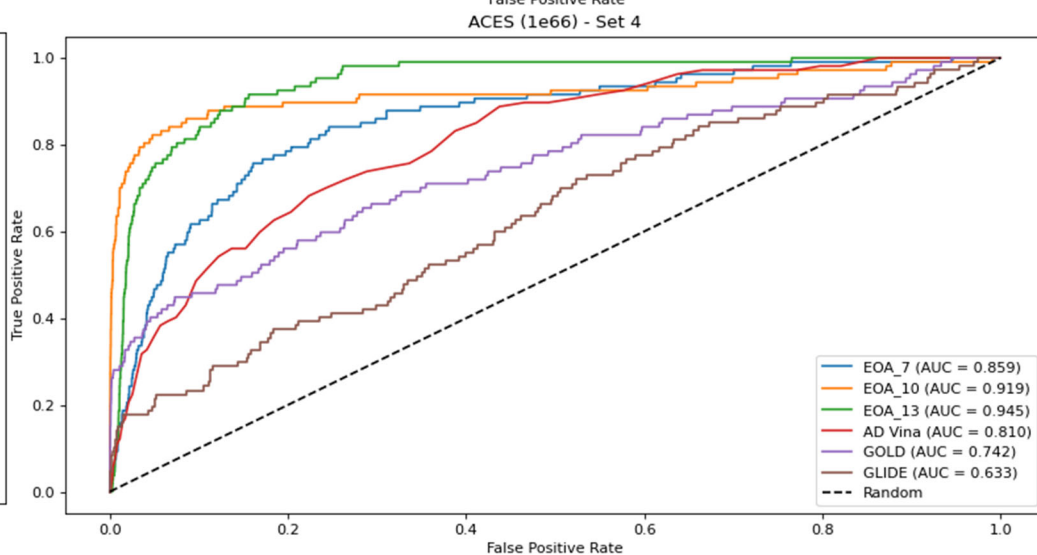

Figure S3. ROC curves for the four ACES (1e66) subsets.



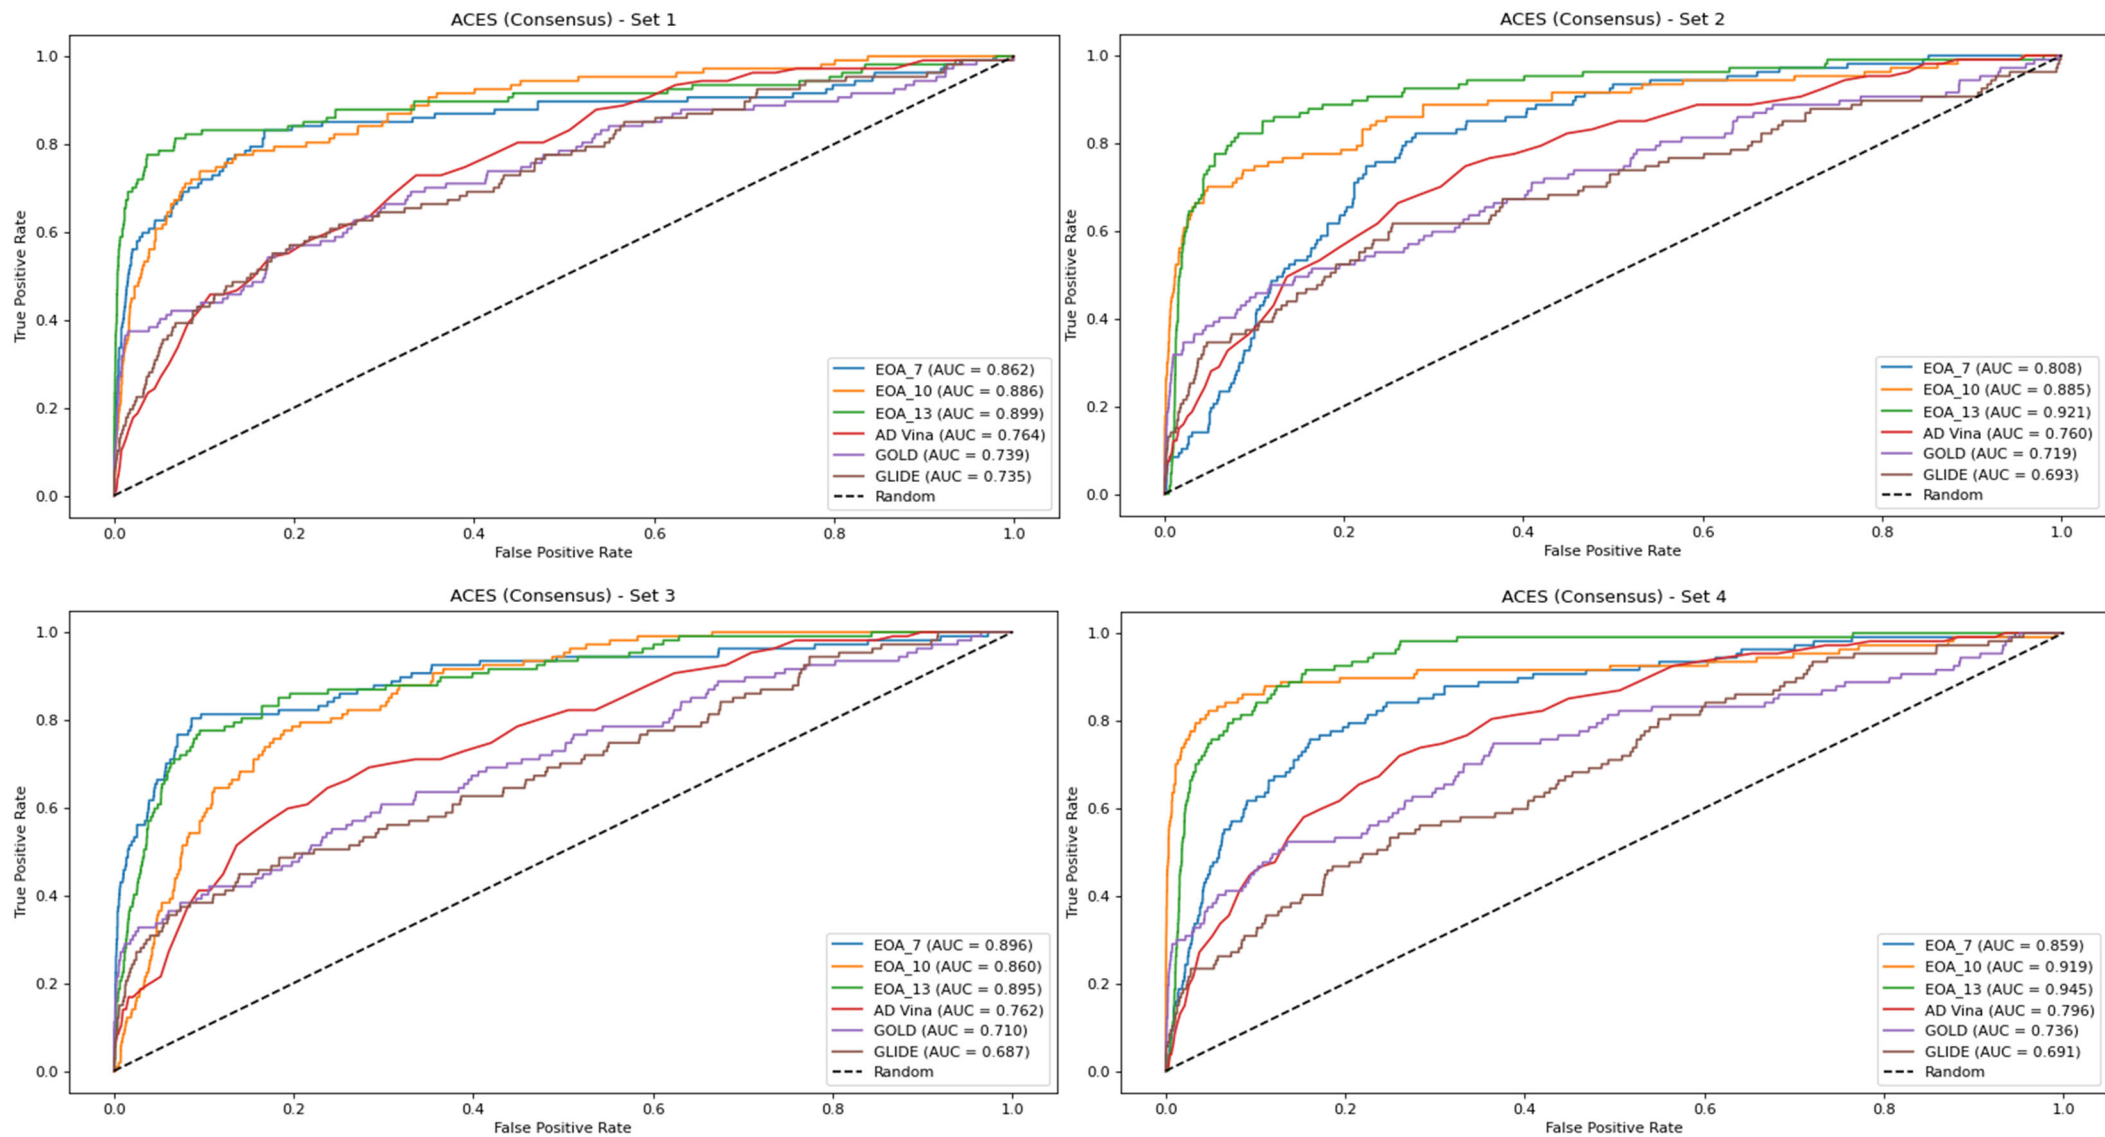

Figure S4. ROC curves for the four ACES (Consensus) subsets.

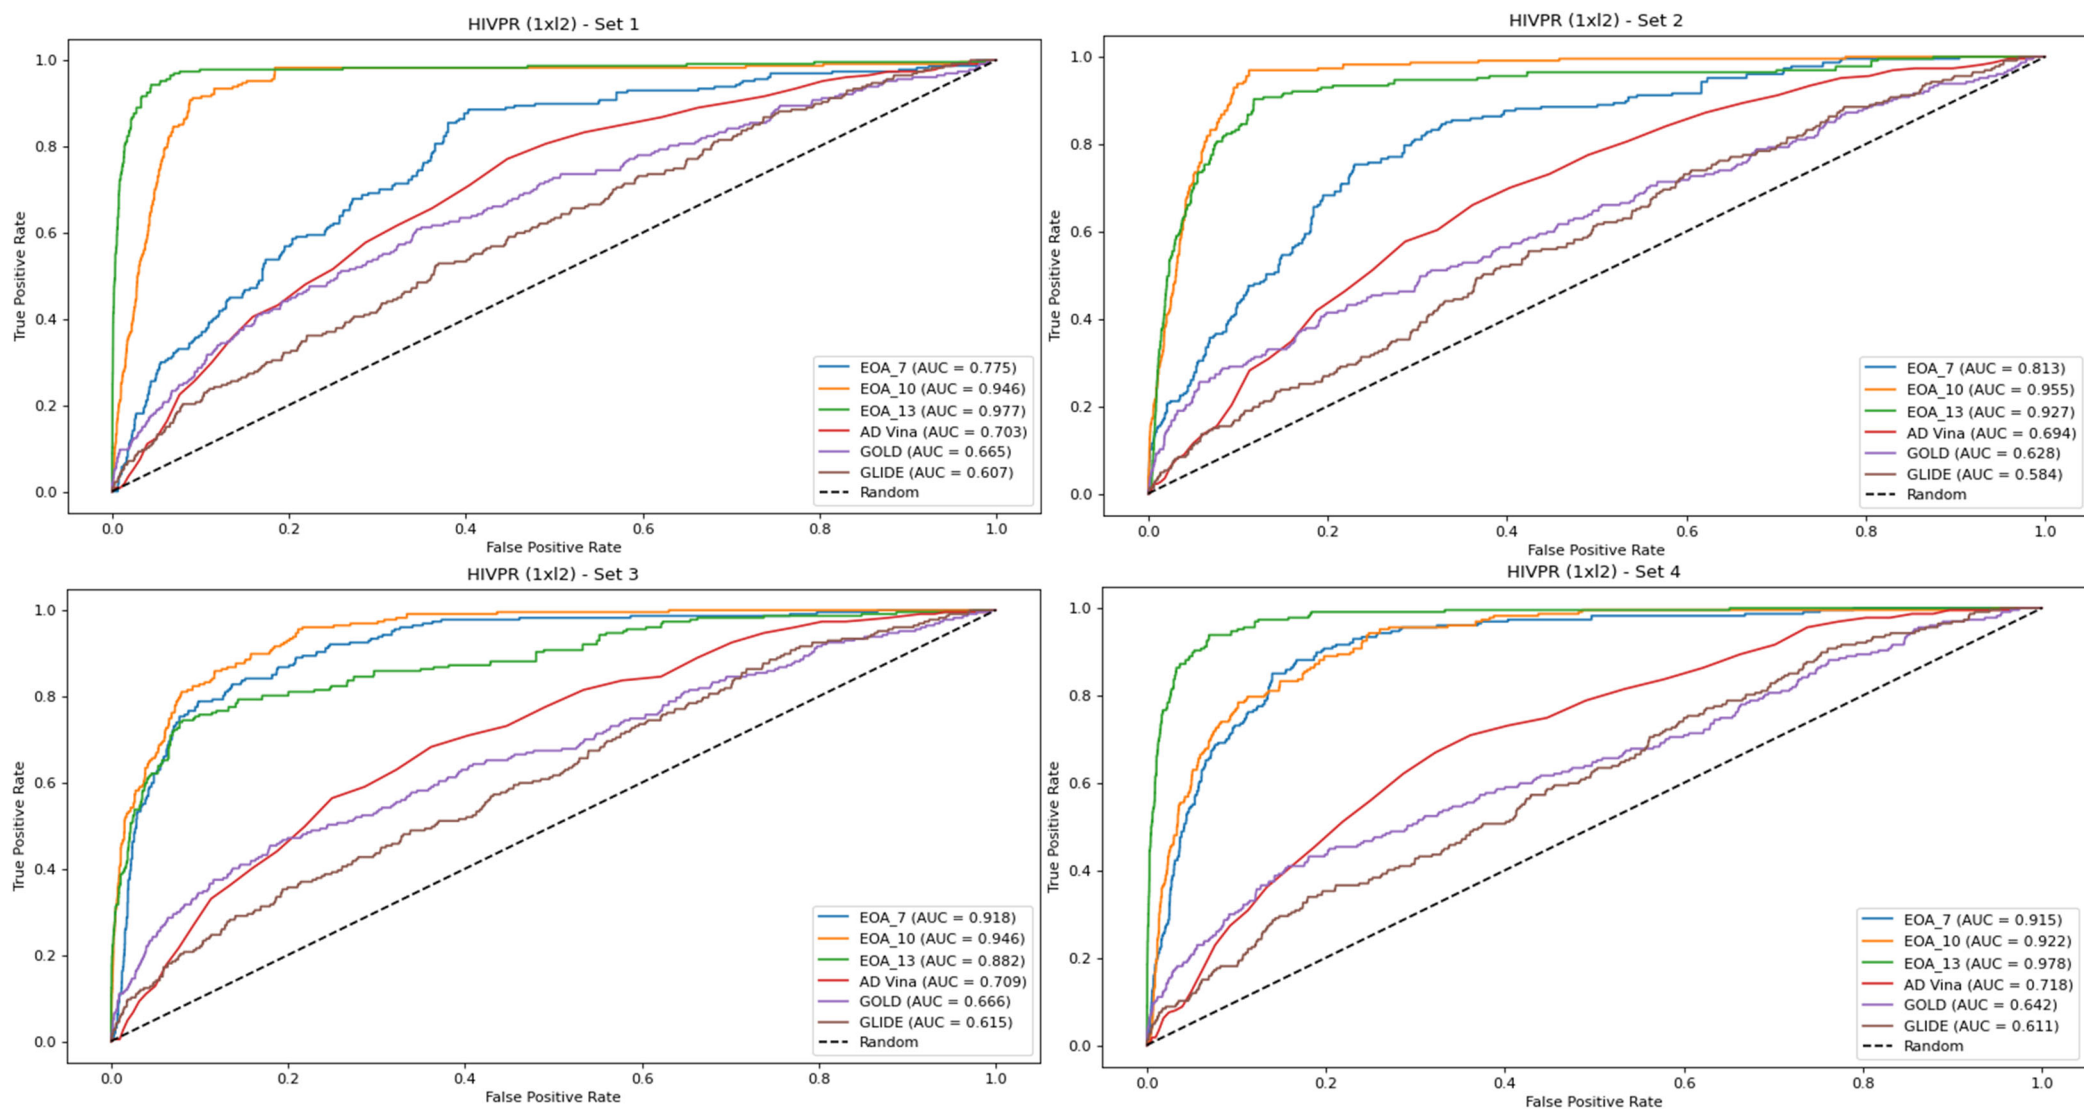

Figure S5. ROC curves for the four HIVPR (1x12) subsets.

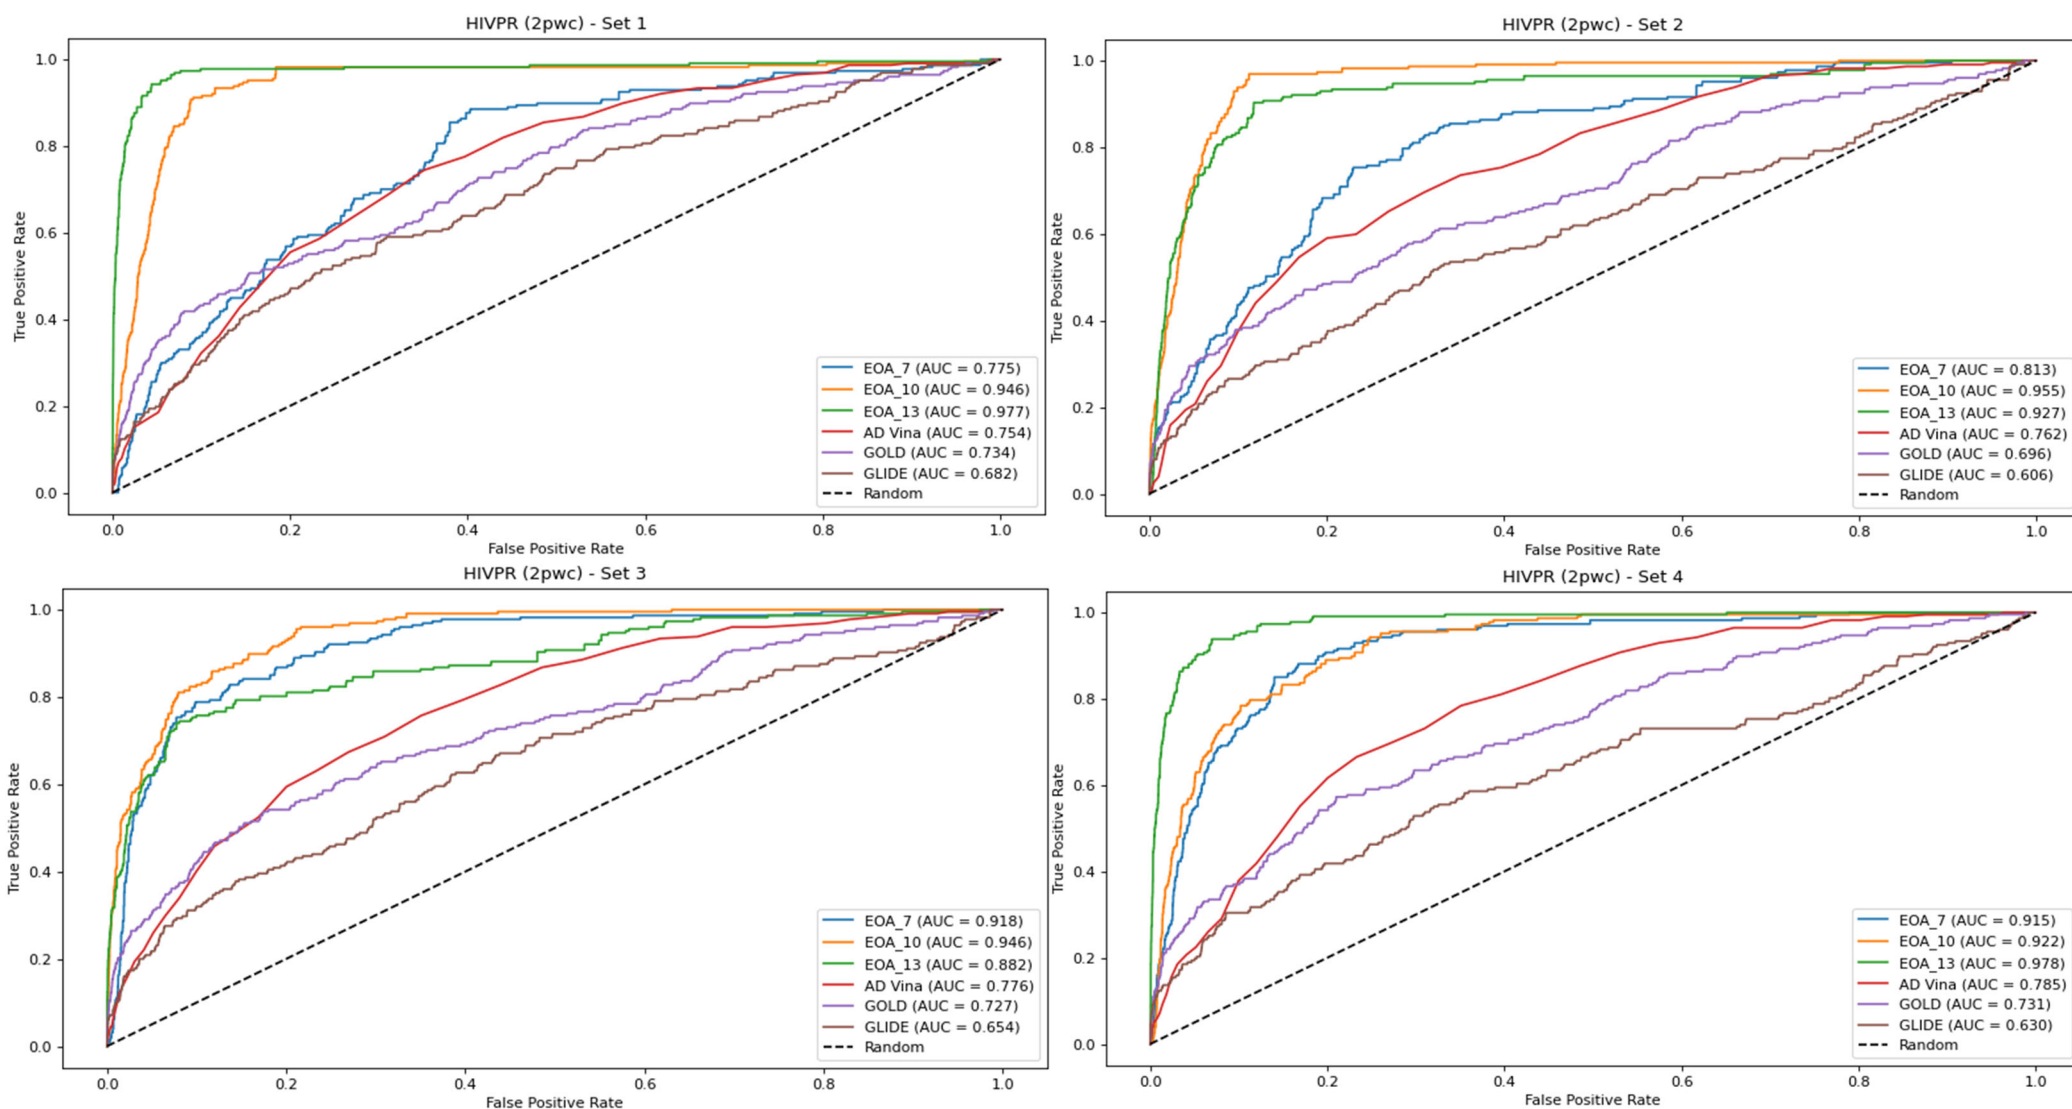

Figure S6. ROC curves for the four HIVPR (2pwc) subsets.

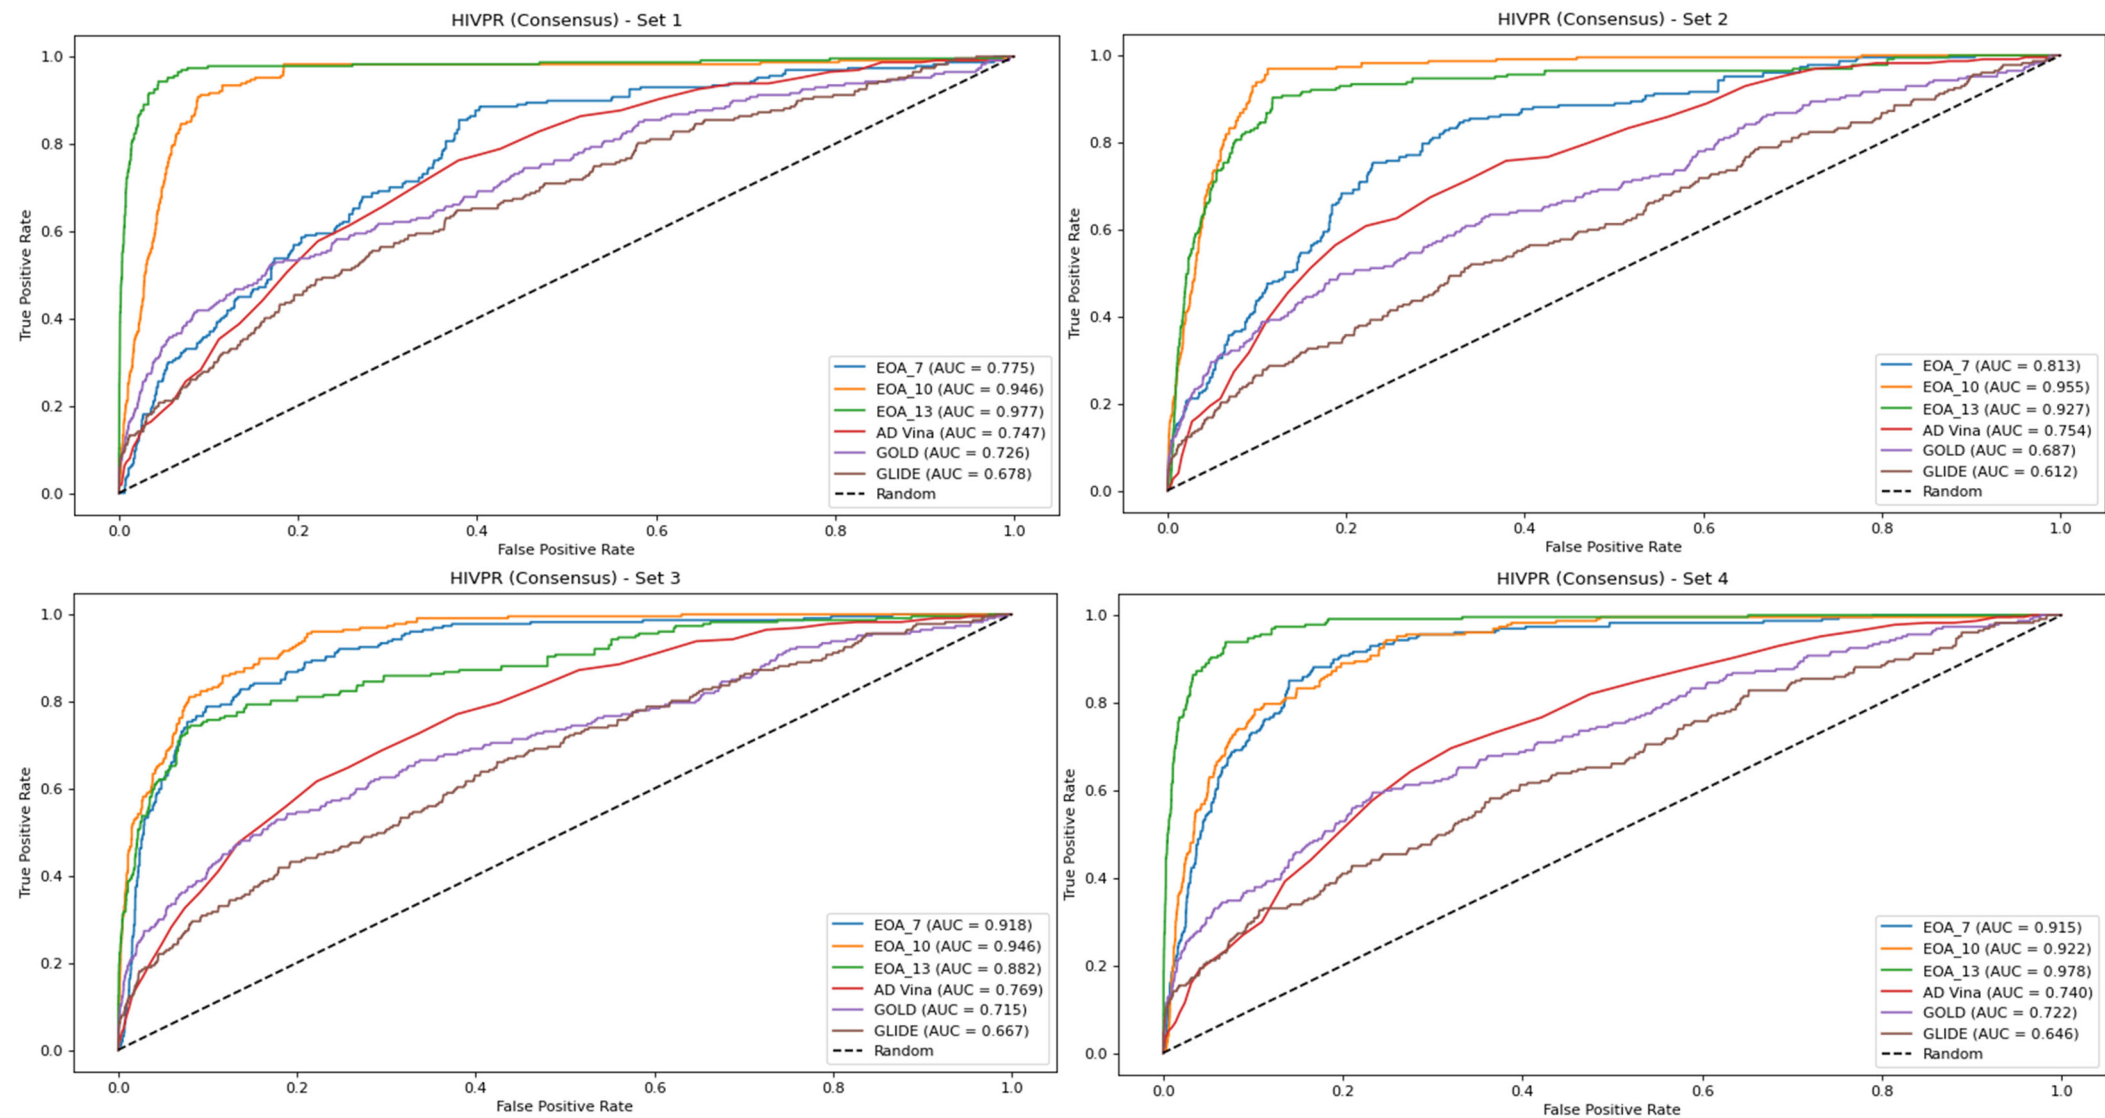

Figure S7. ROC curves for the four HIVPR (Consensus) subsets.

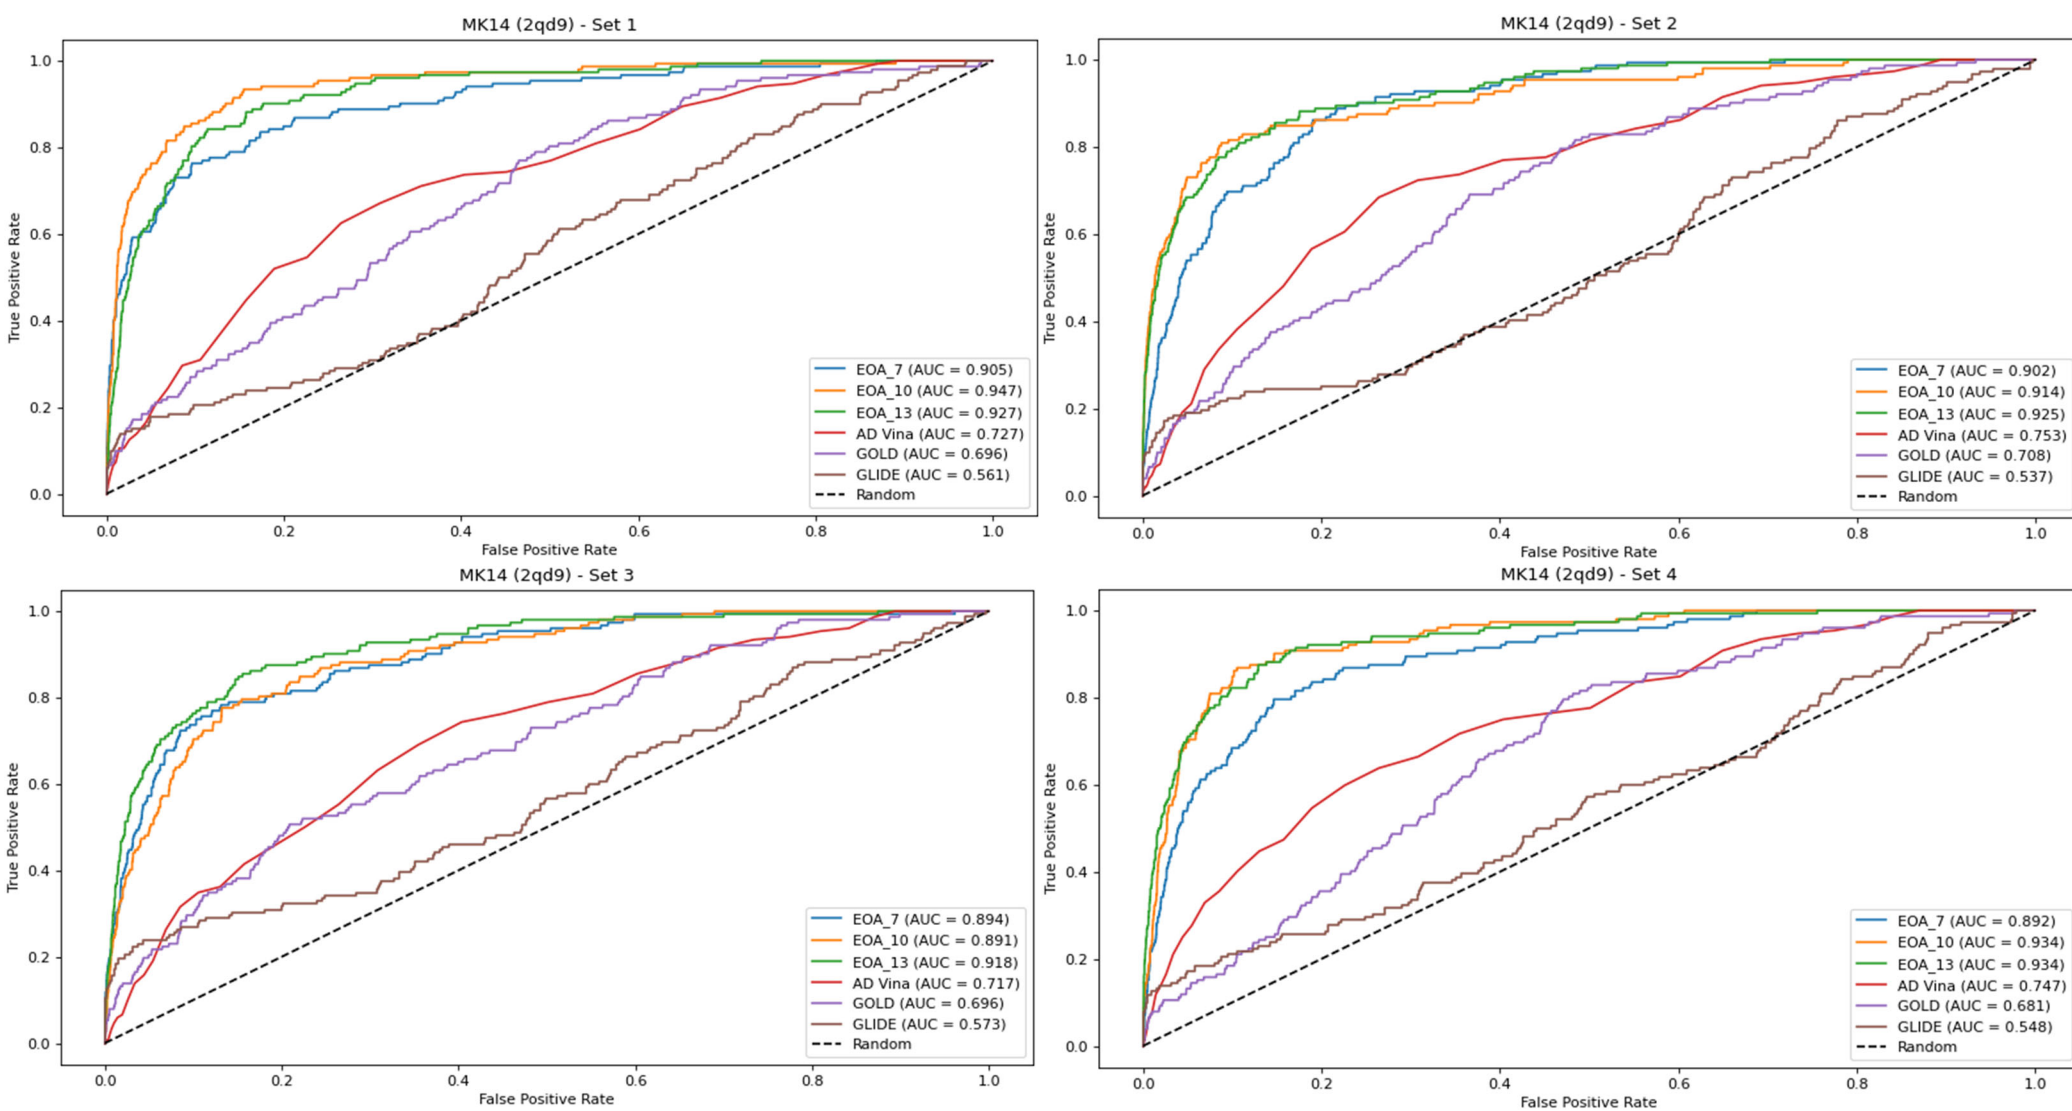

Figure S8. ROC curves for the four MK14 (2qd9) subsets.



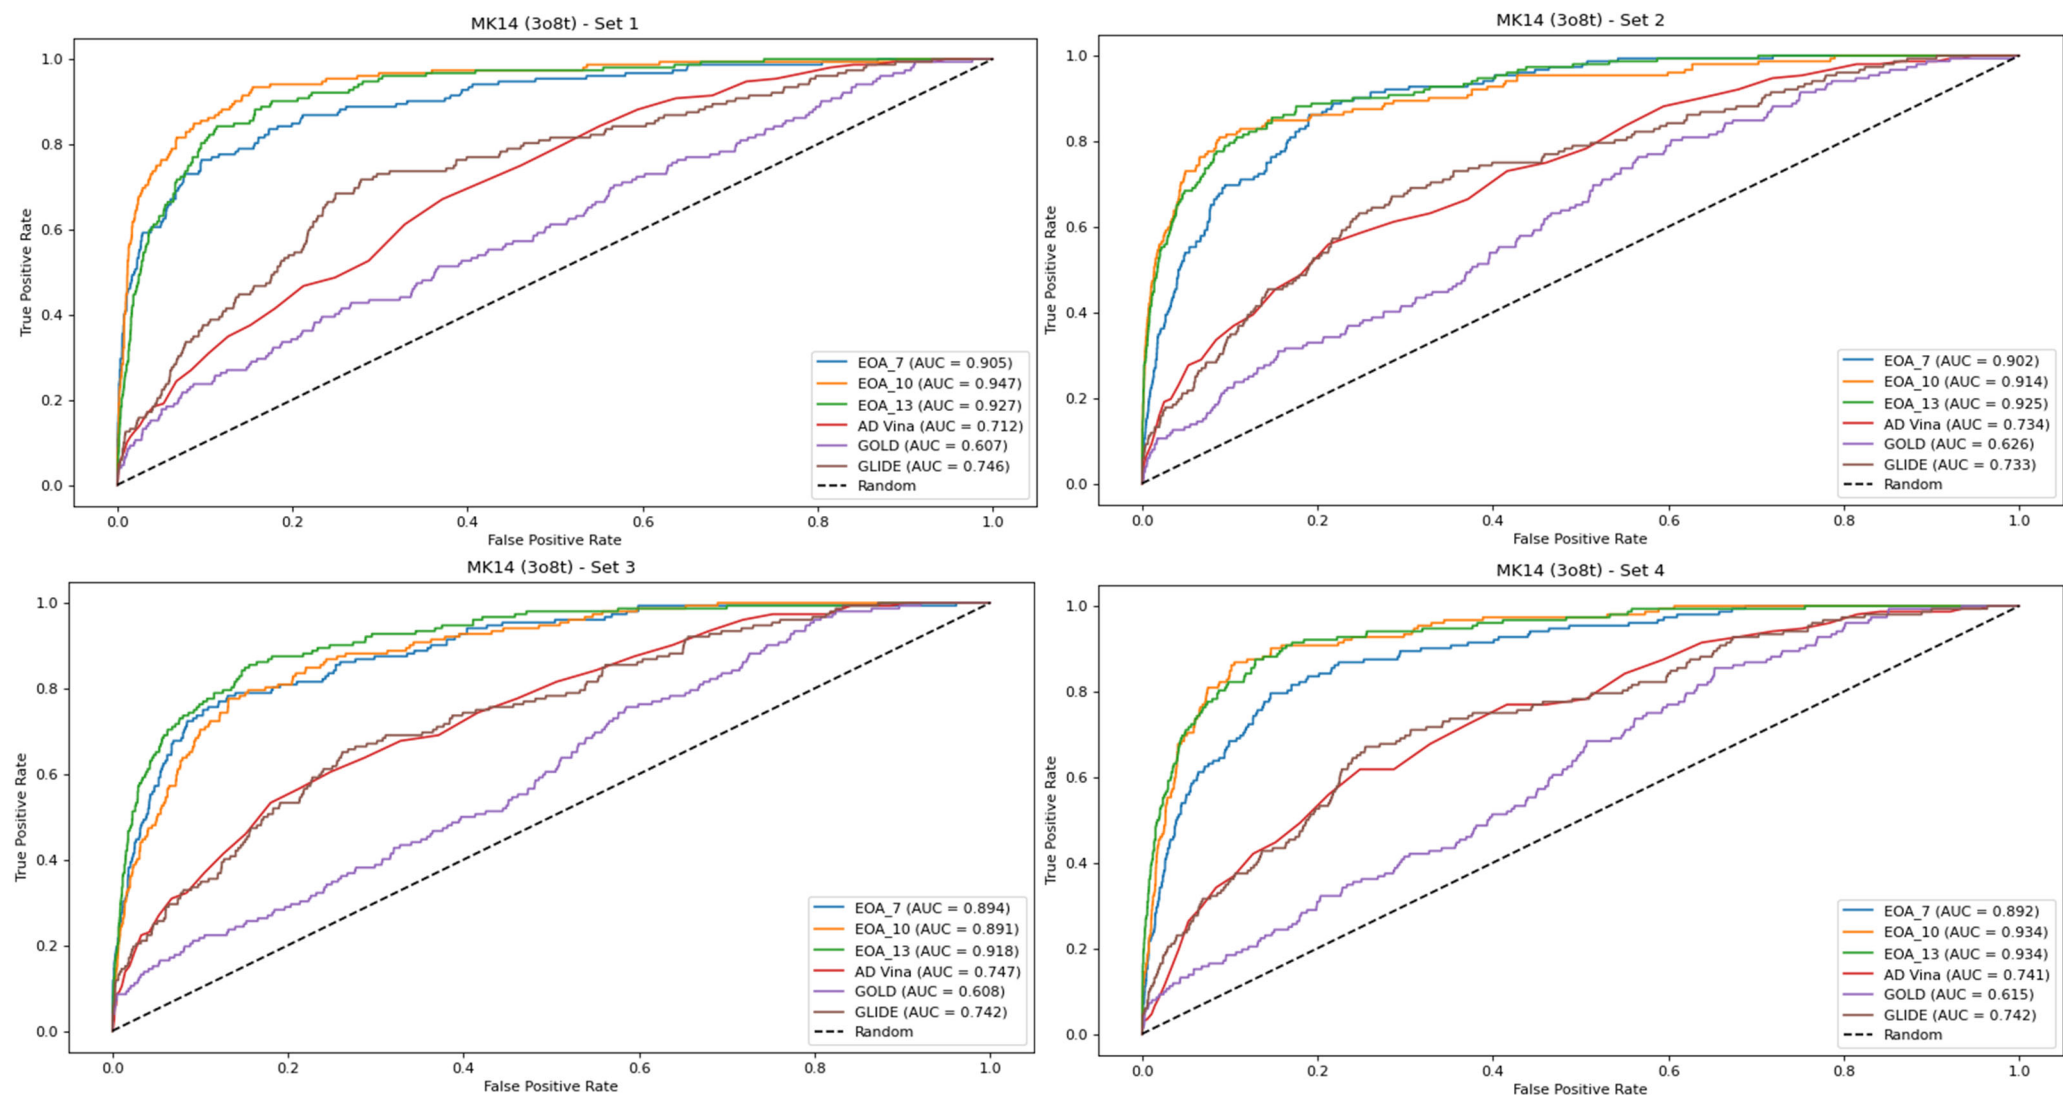

Figure S9. ROC curves for the four MK14 (3o8t) subsets.

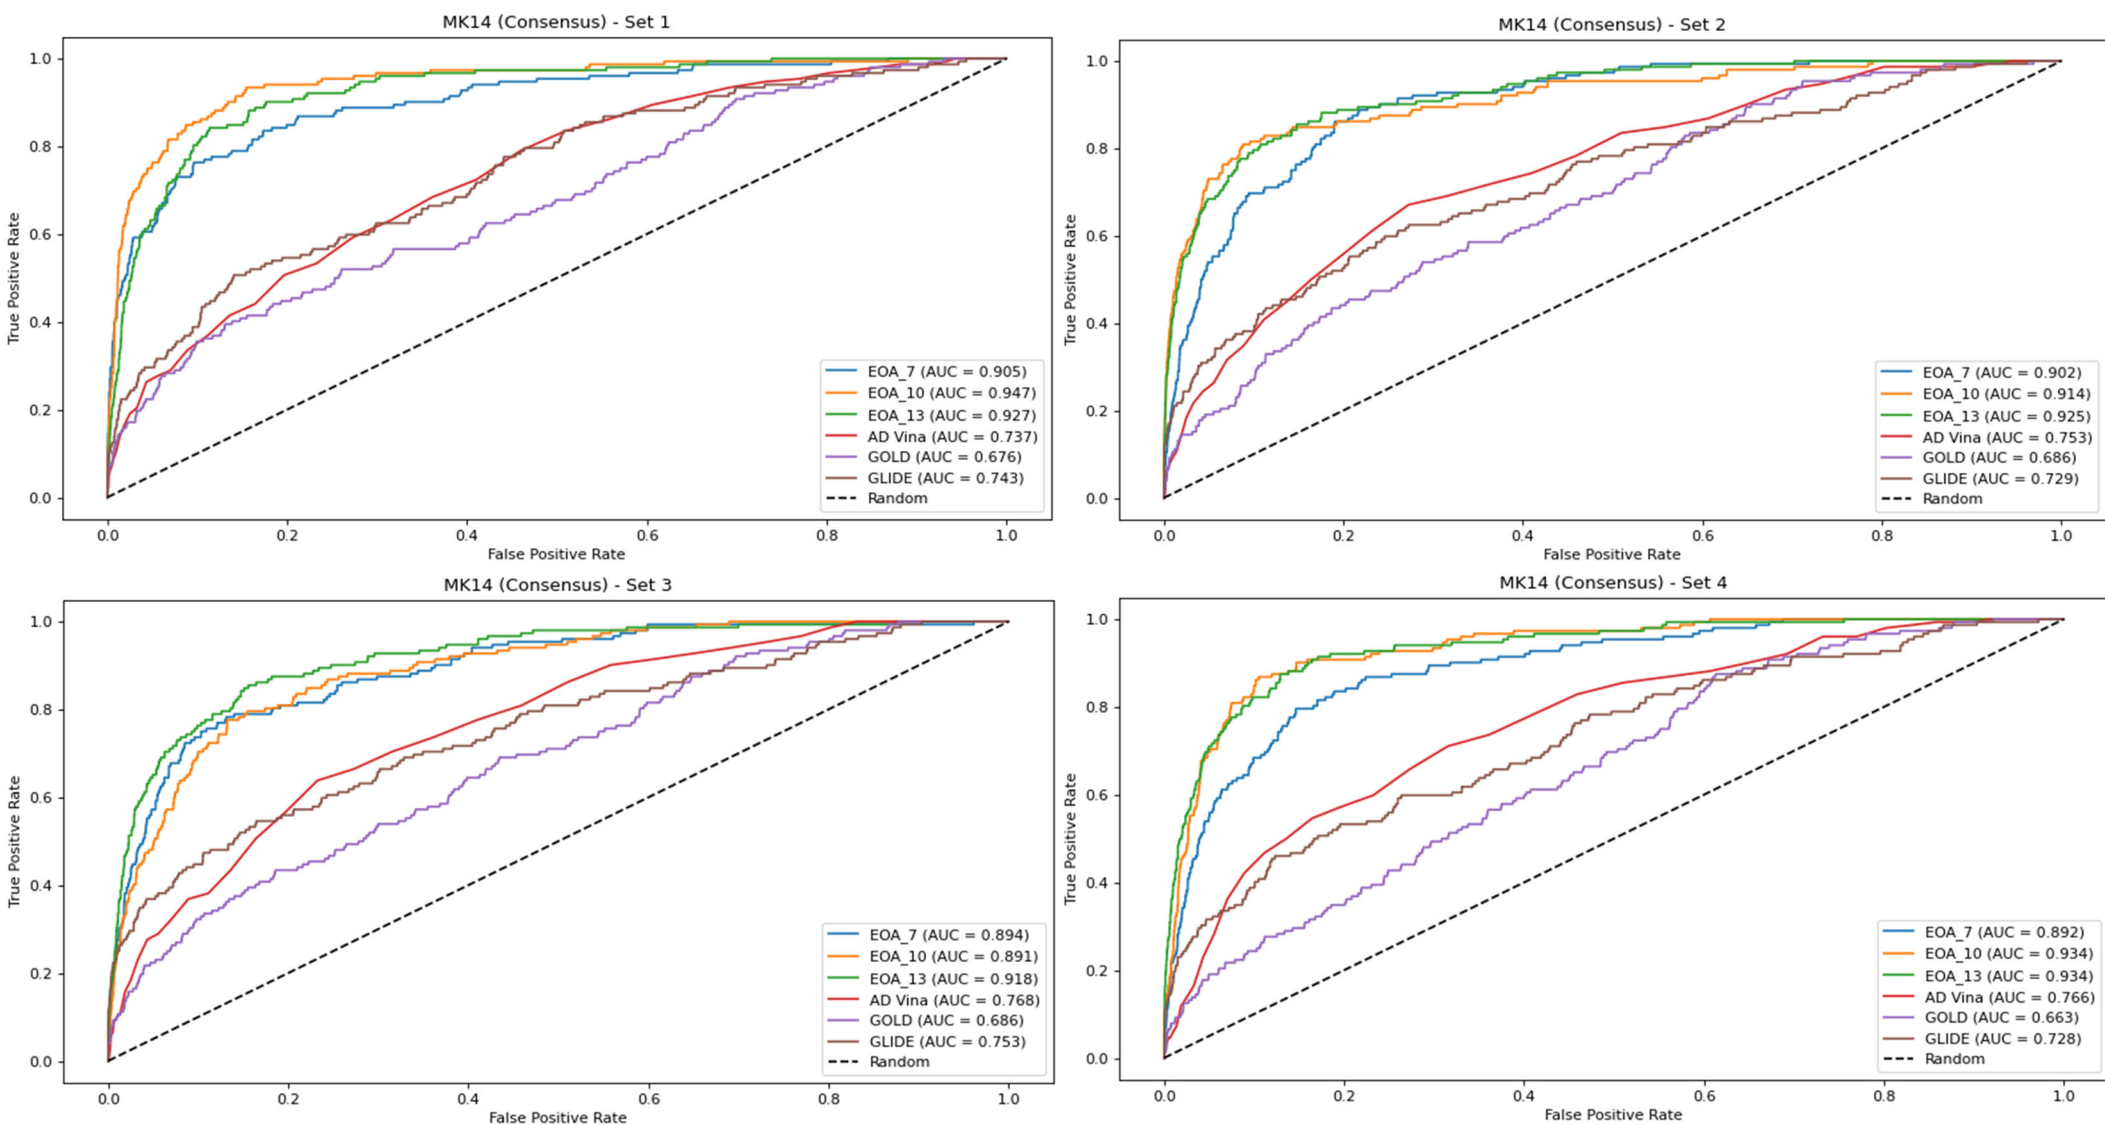

Figure S10. ROC curves for the four MK14 (Consensus) subsets.

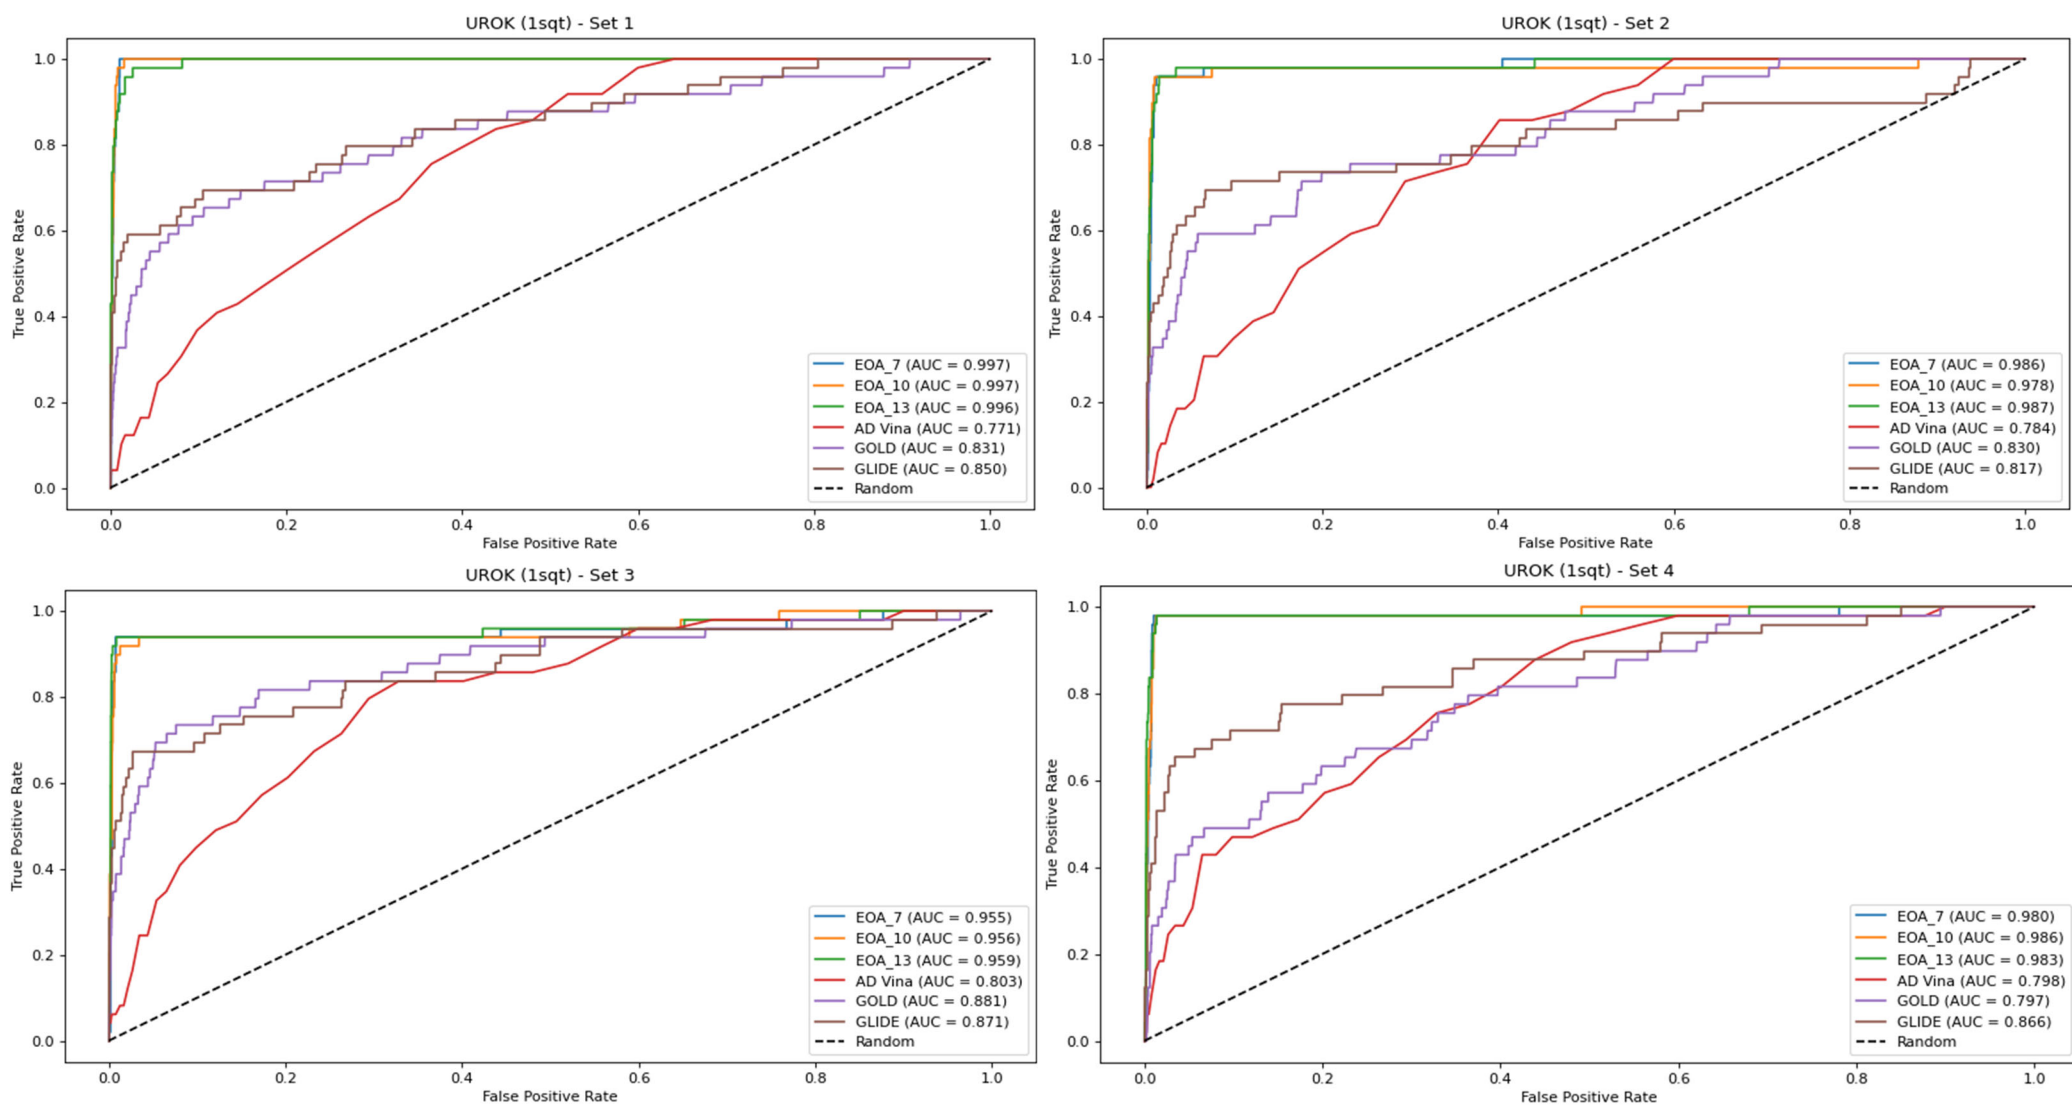

Figure S11. ROC curves for the four UROK (1sqt) subsets.



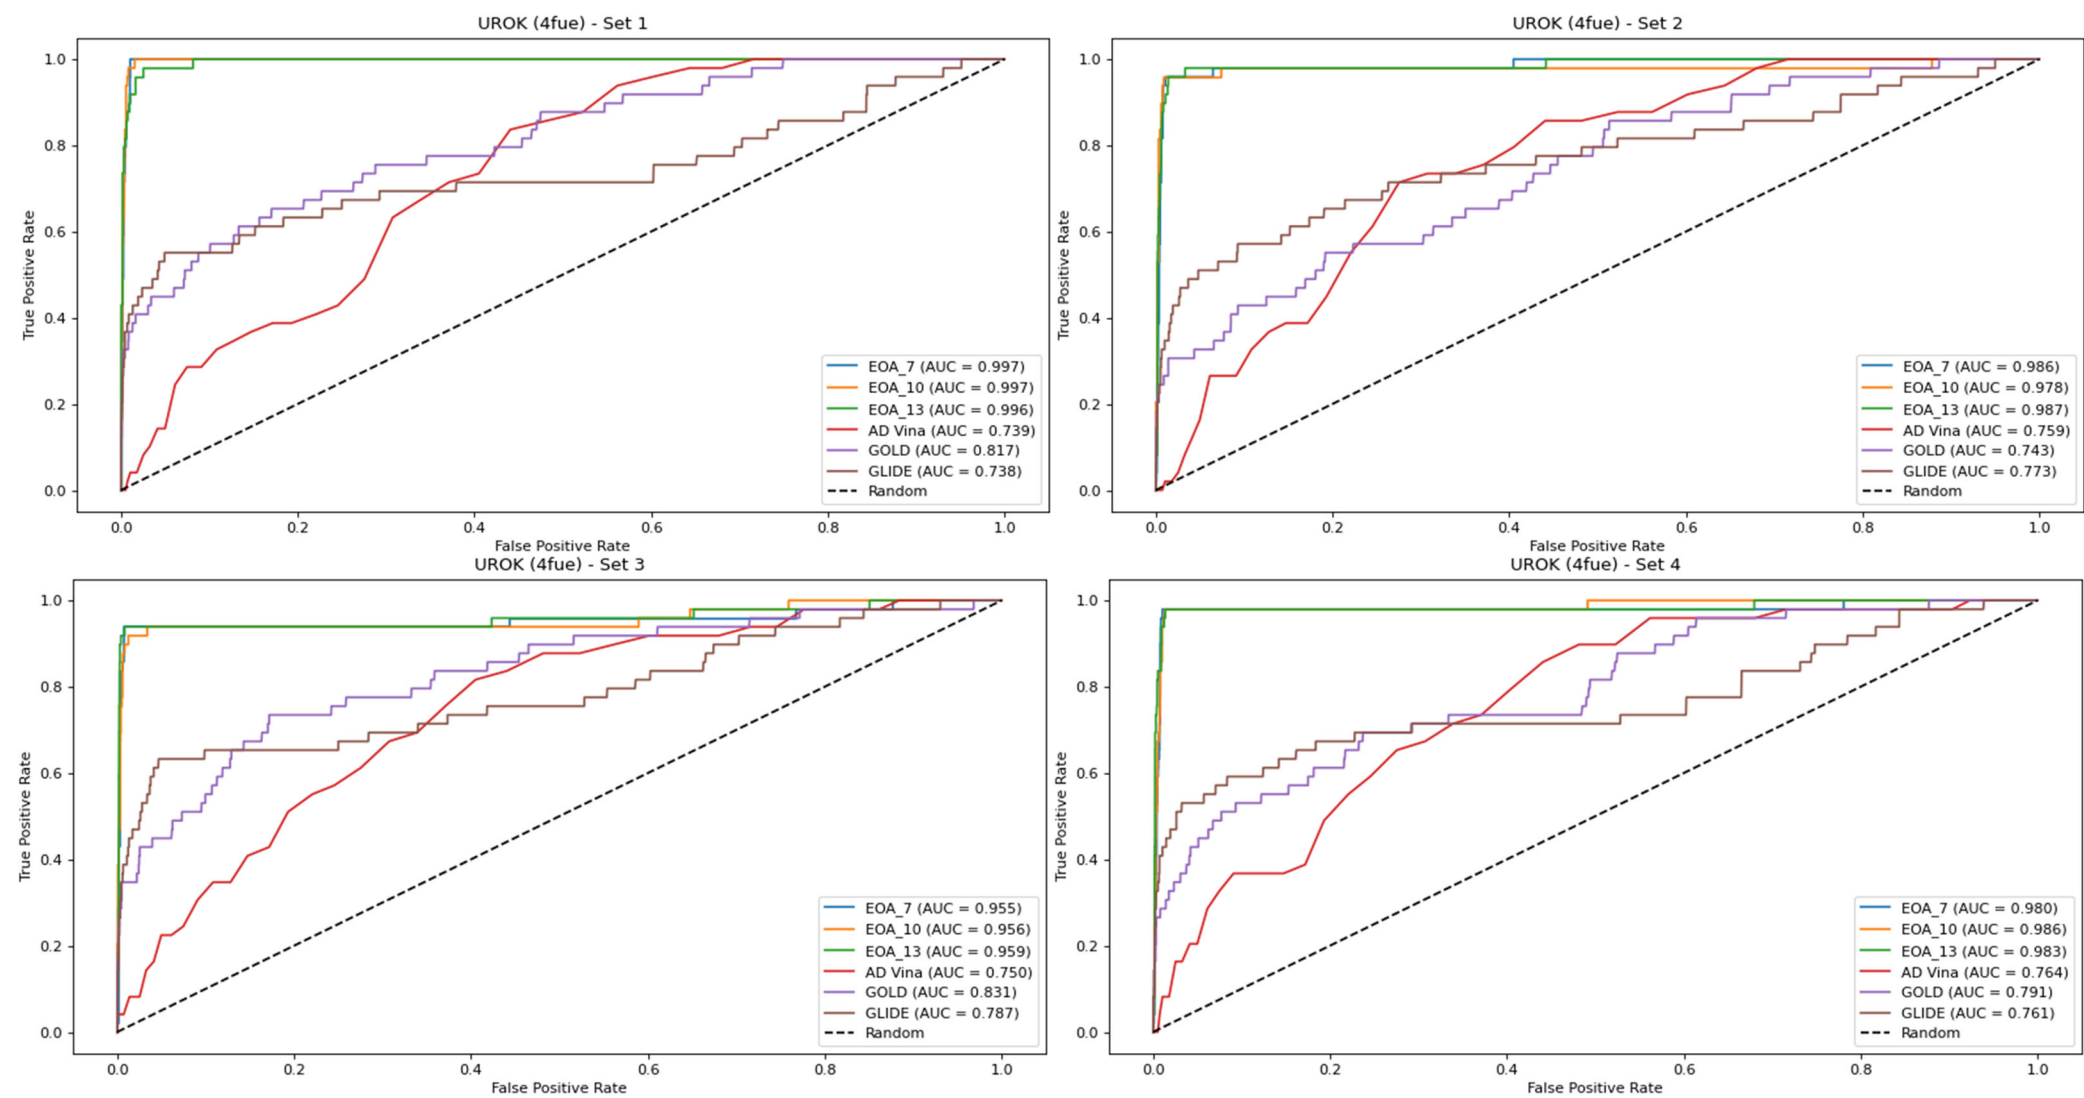

Figure S12. ROC curves for the four UROK (4fue) subsets.

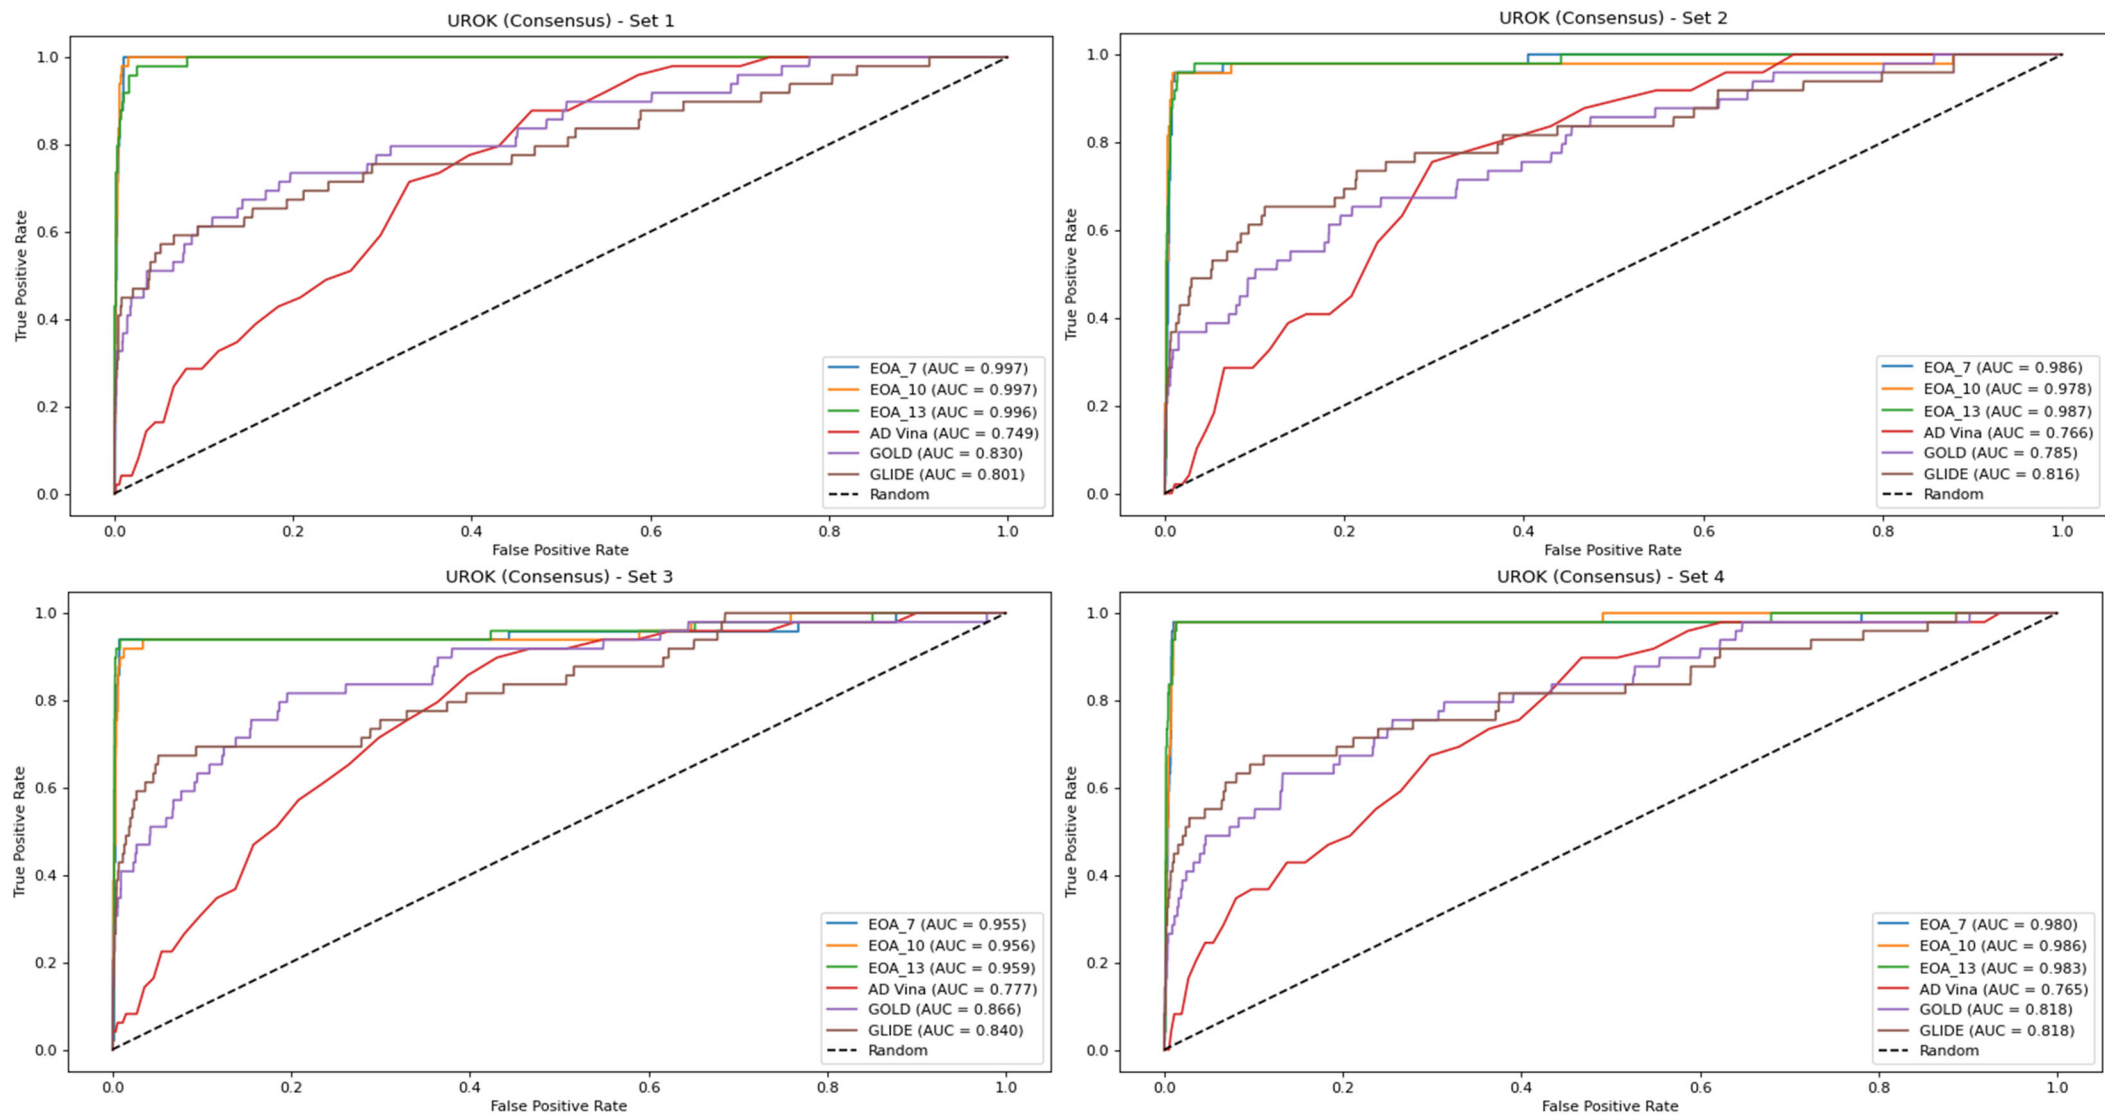

Figure S13. ROC curves for the four UROK (Consensus) subsets.

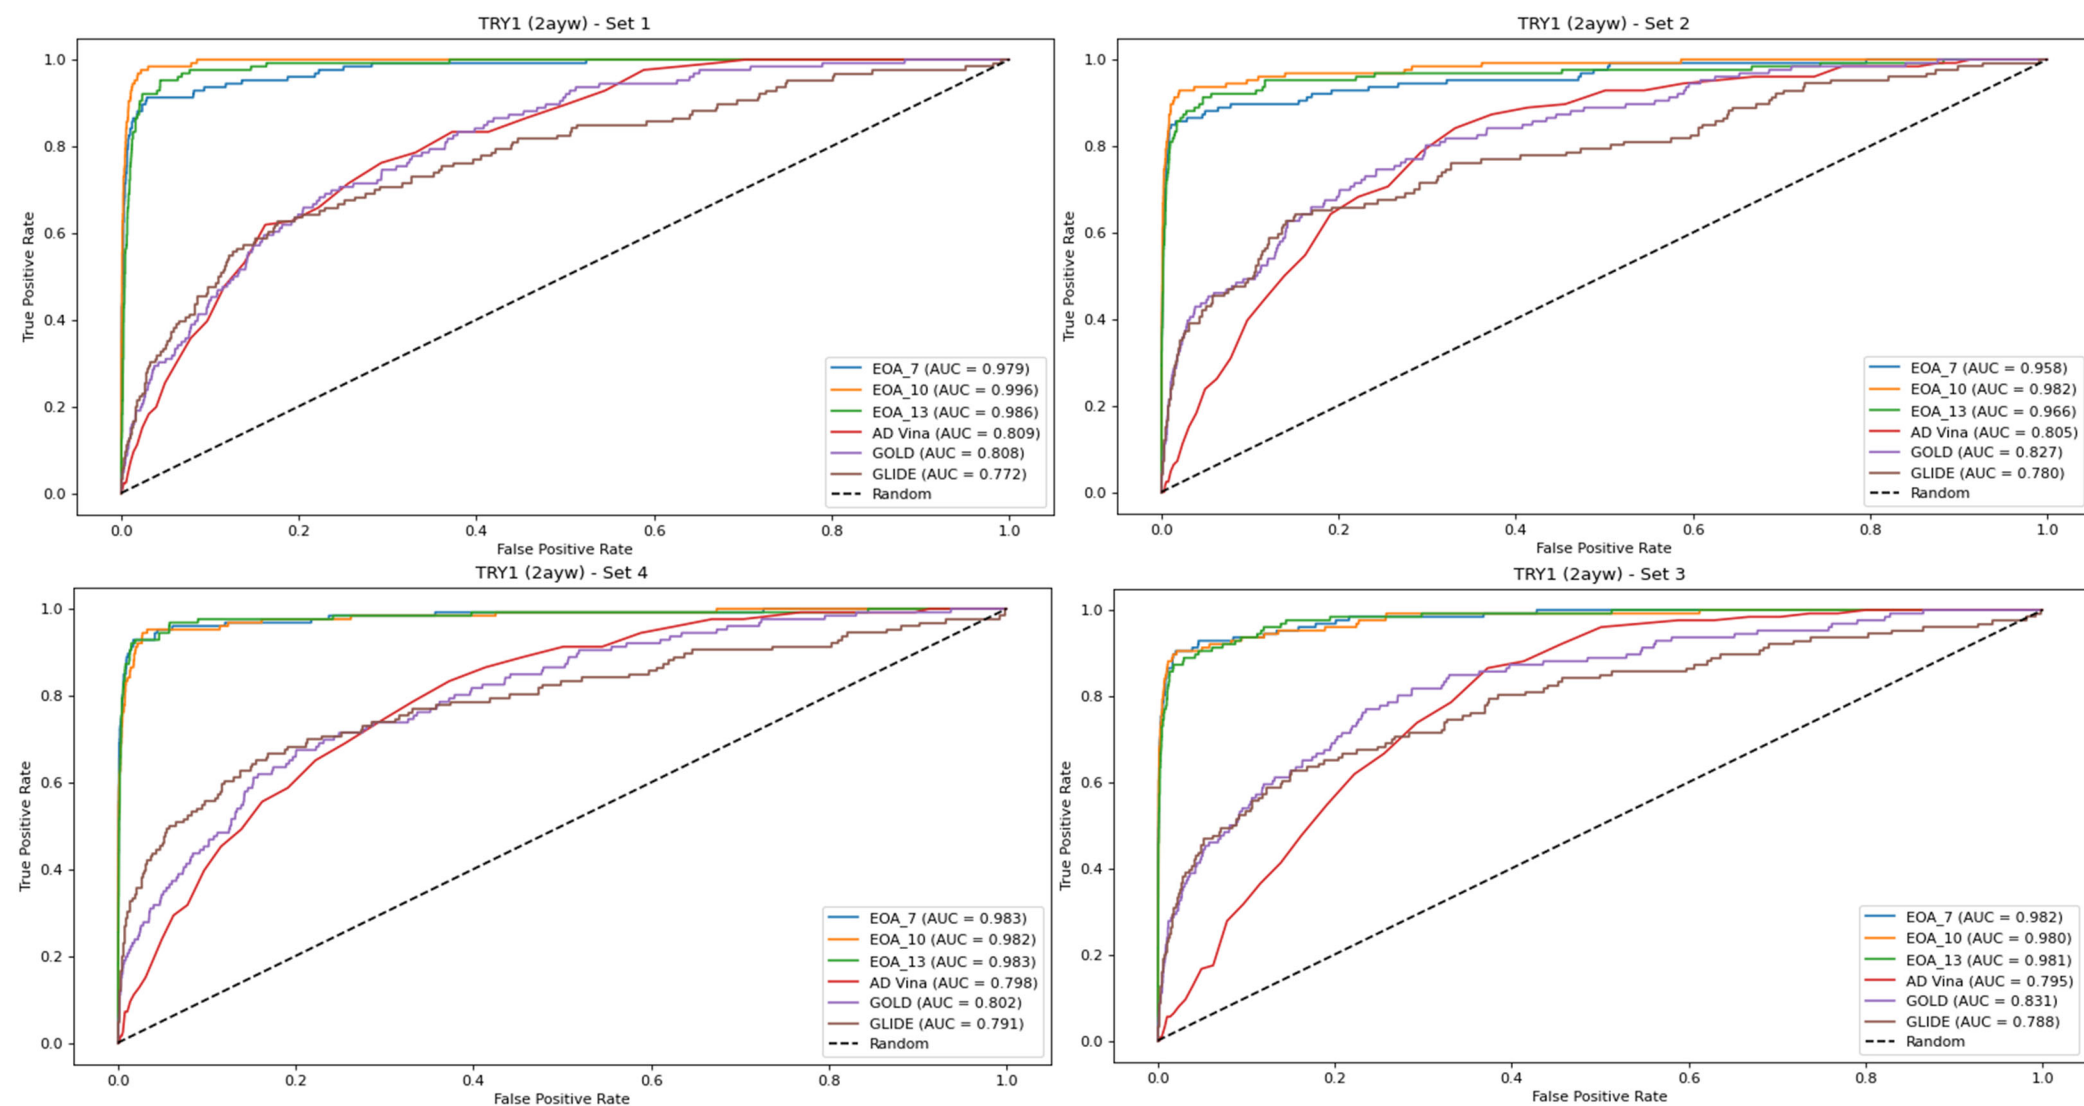

Figure S14. ROC curves for the four TRY1 (2ayw) subsets.

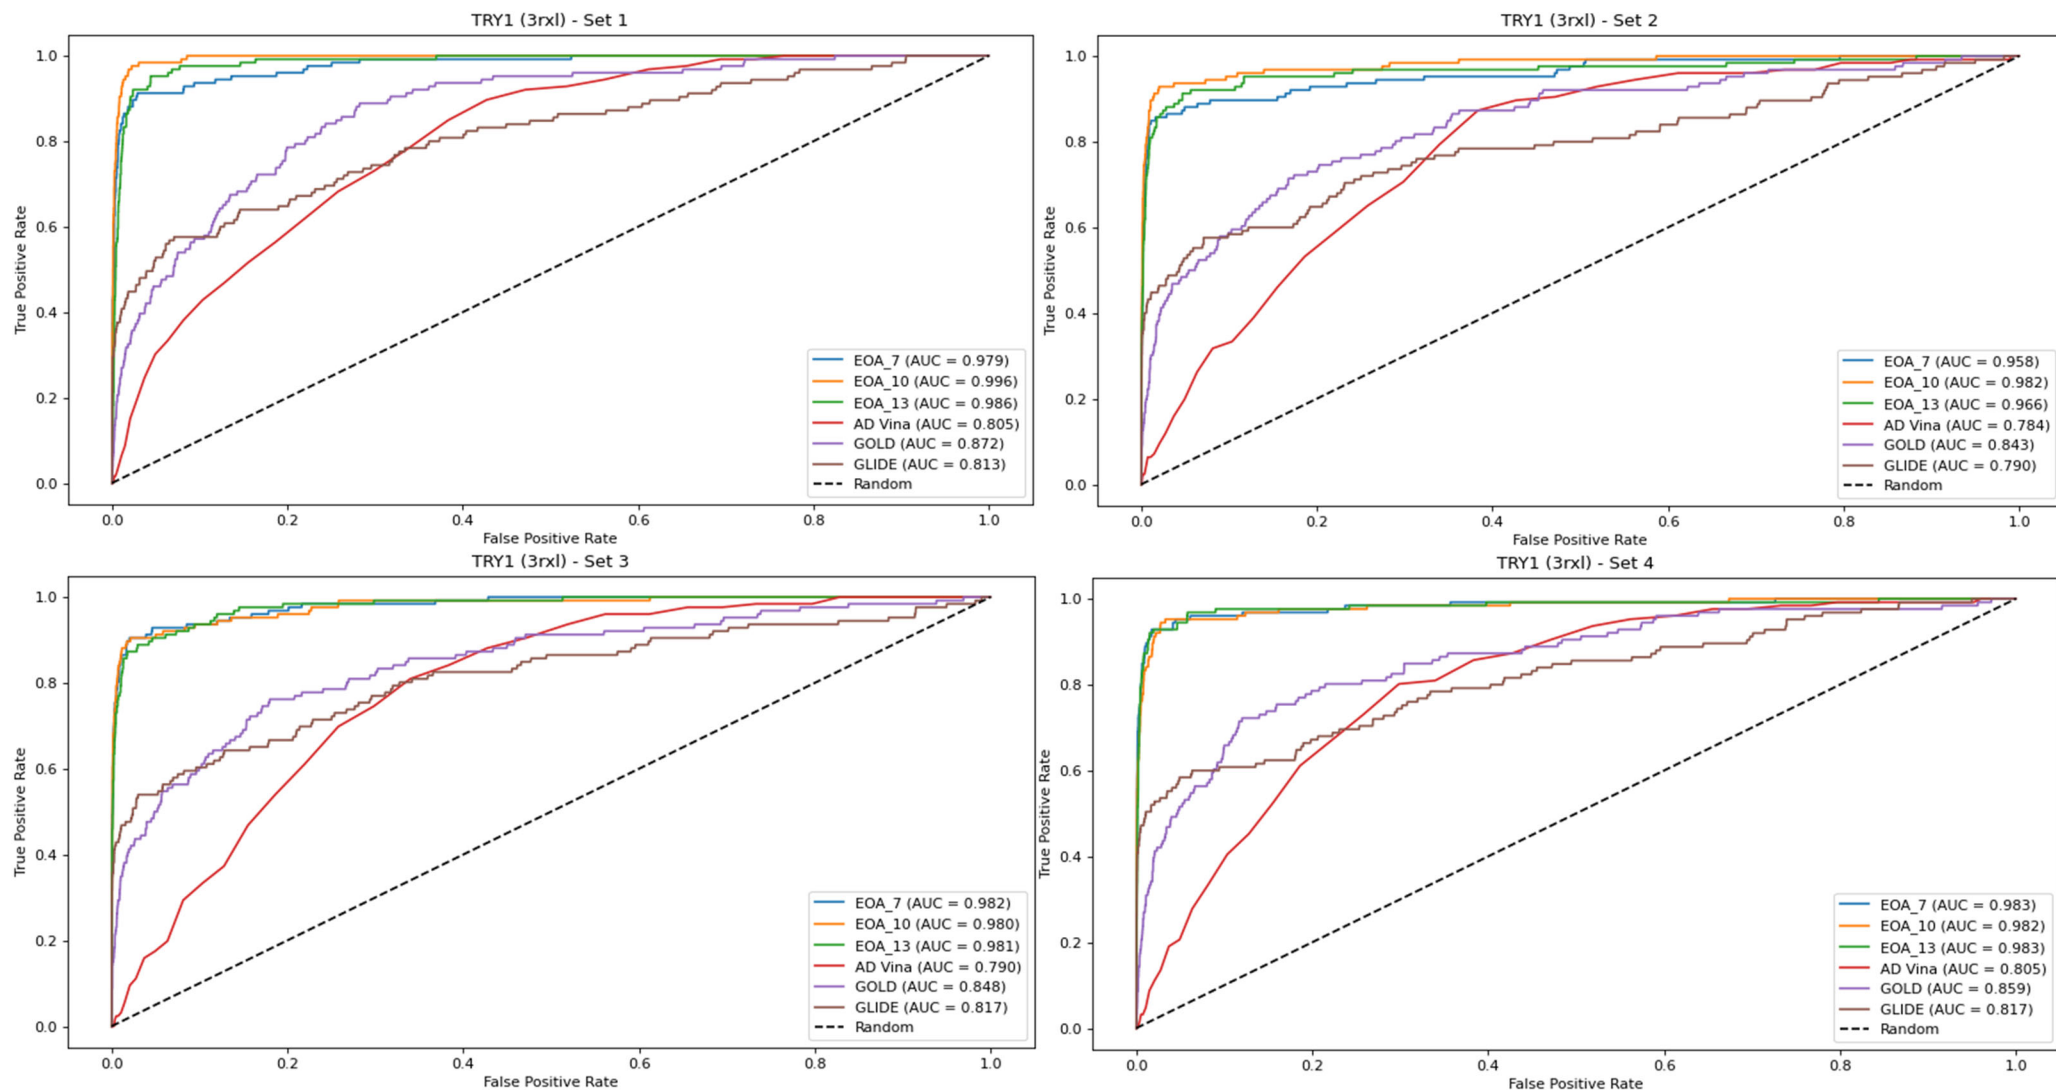

Figure S15. ROC curves for the four TRY1 (3rxl) subsets.

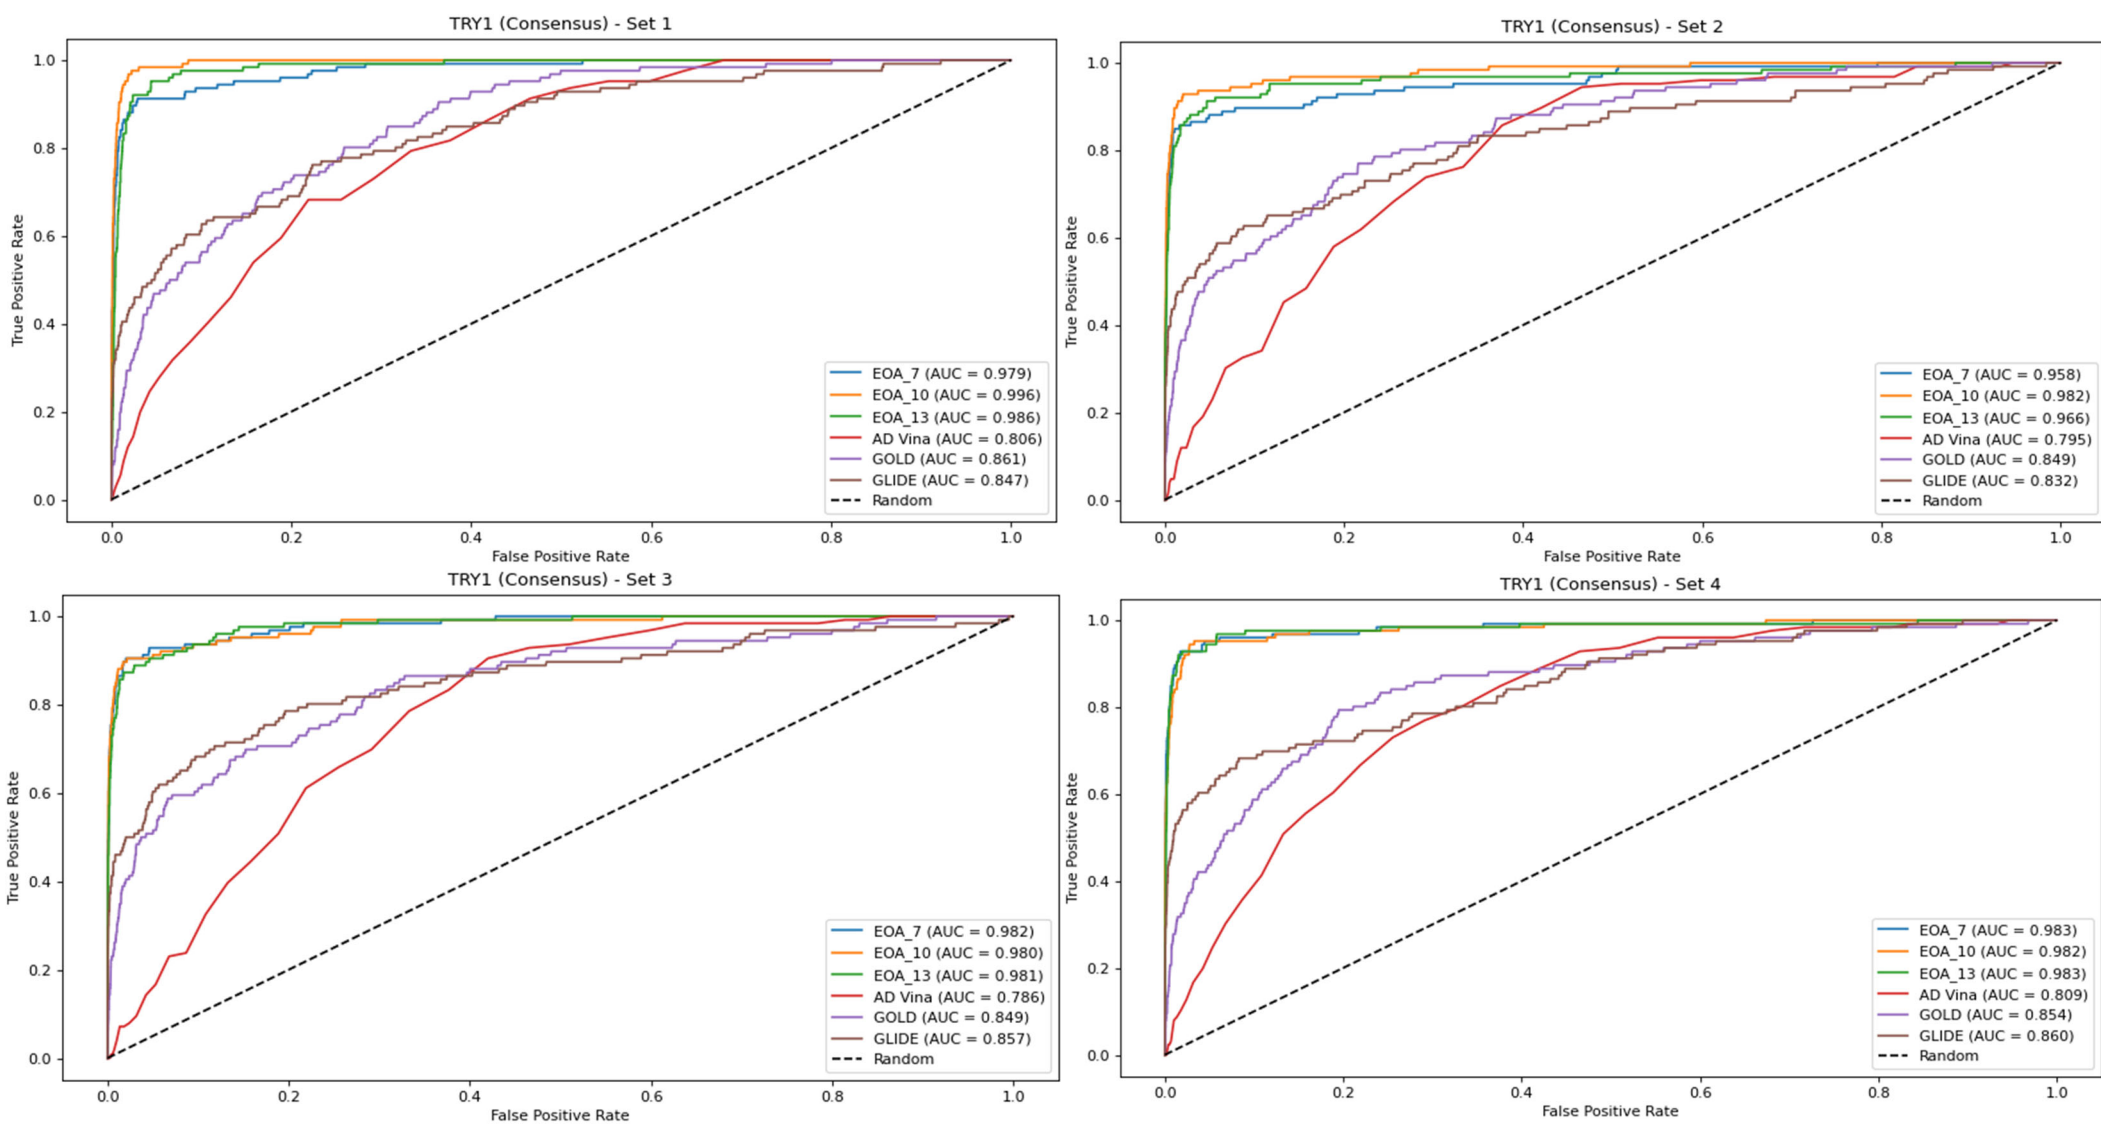

Figure S16. ROC curves for the four TRY1 (Consensus) subsets.
